# Supplementary material for: Differential location of NKT and MAIT cells within lymphoid tissue
Source: PubMed Central journal article supplement (PMC8904549; doi:10.1038/s41598-022-07704-4), 2022-03-08

Supplementary Fig S1

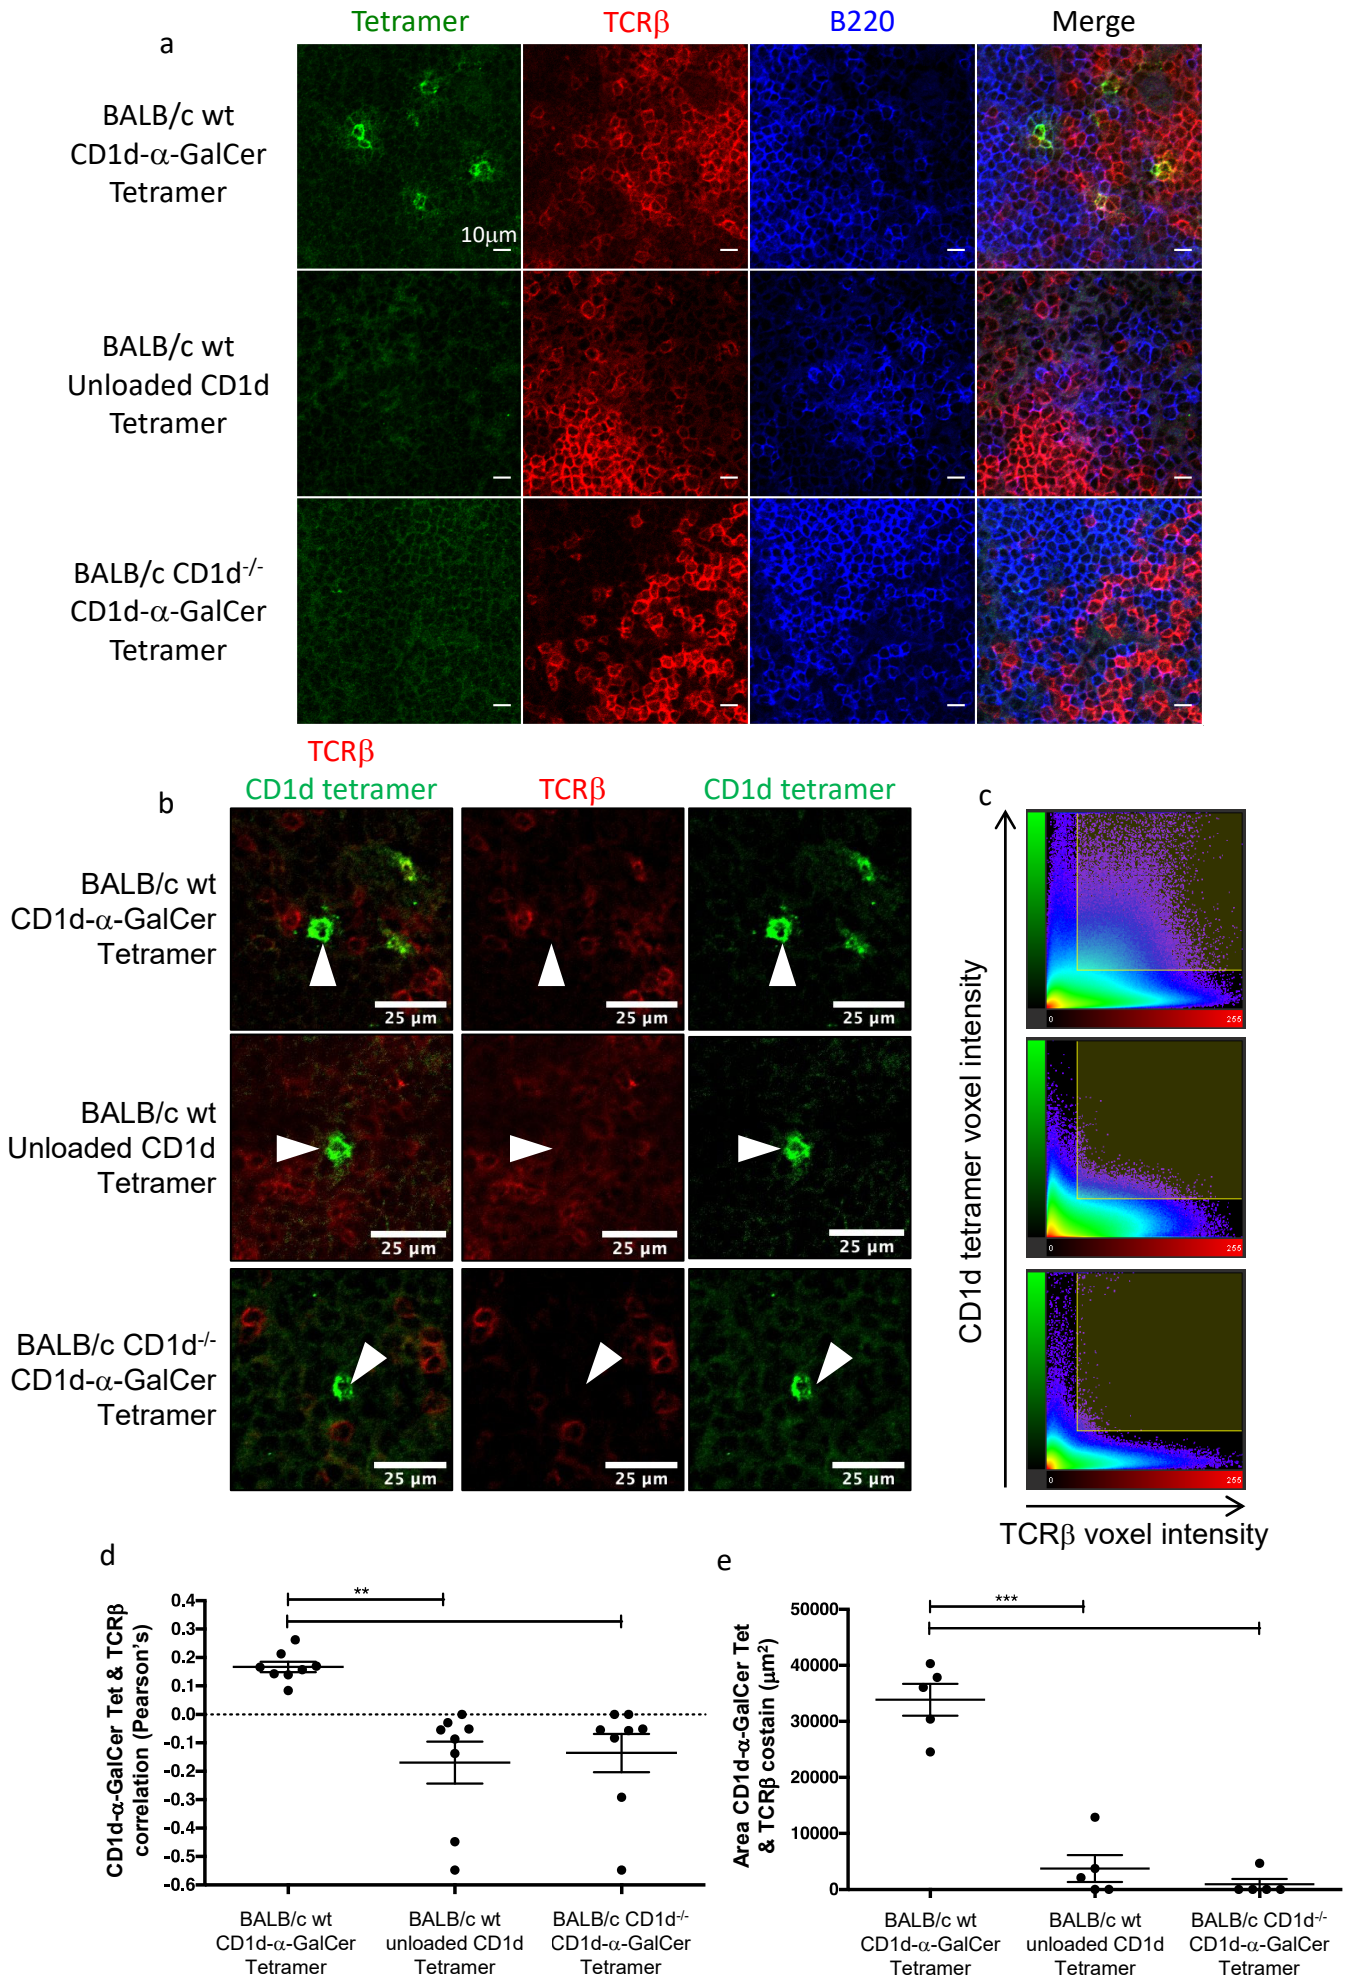

Supplementary Fig S2

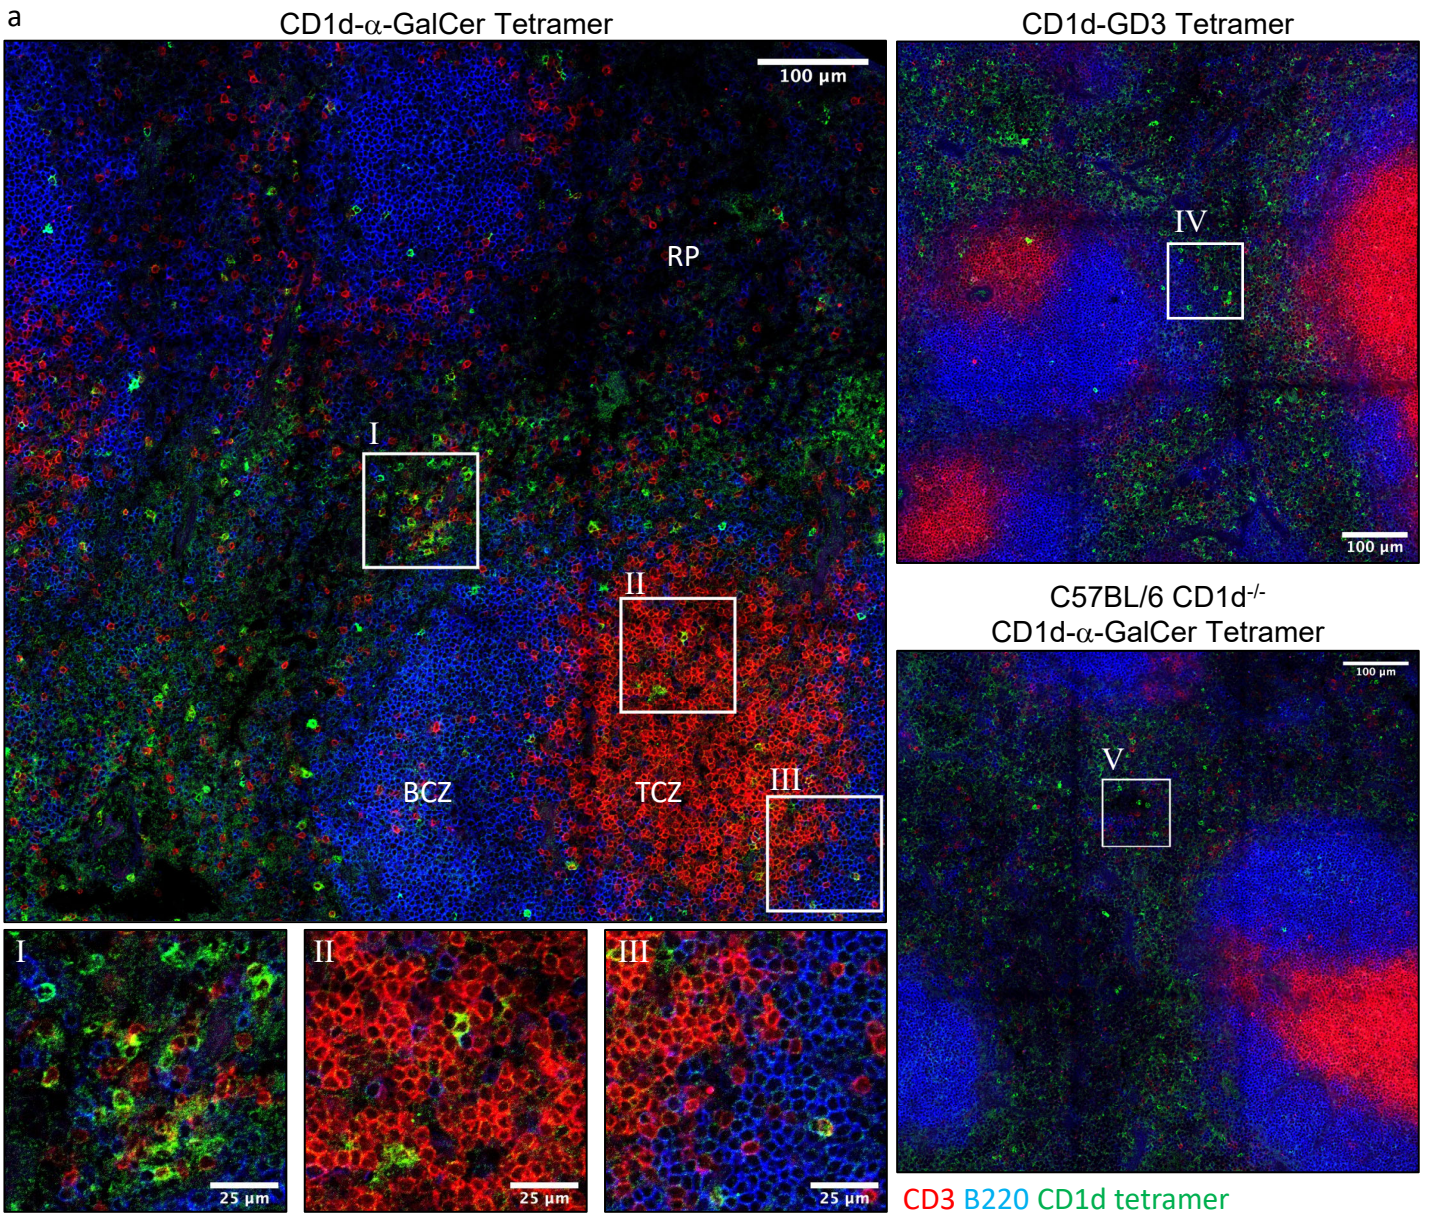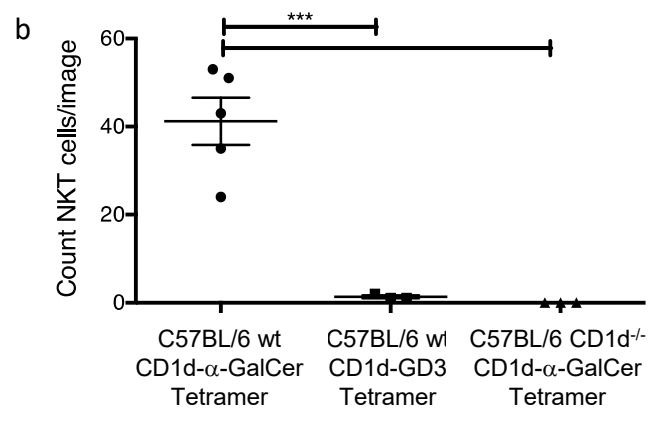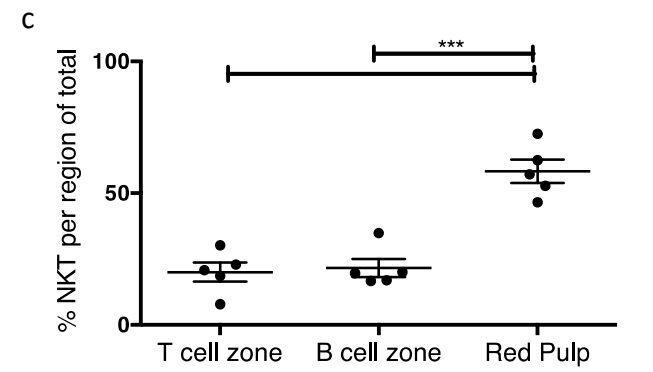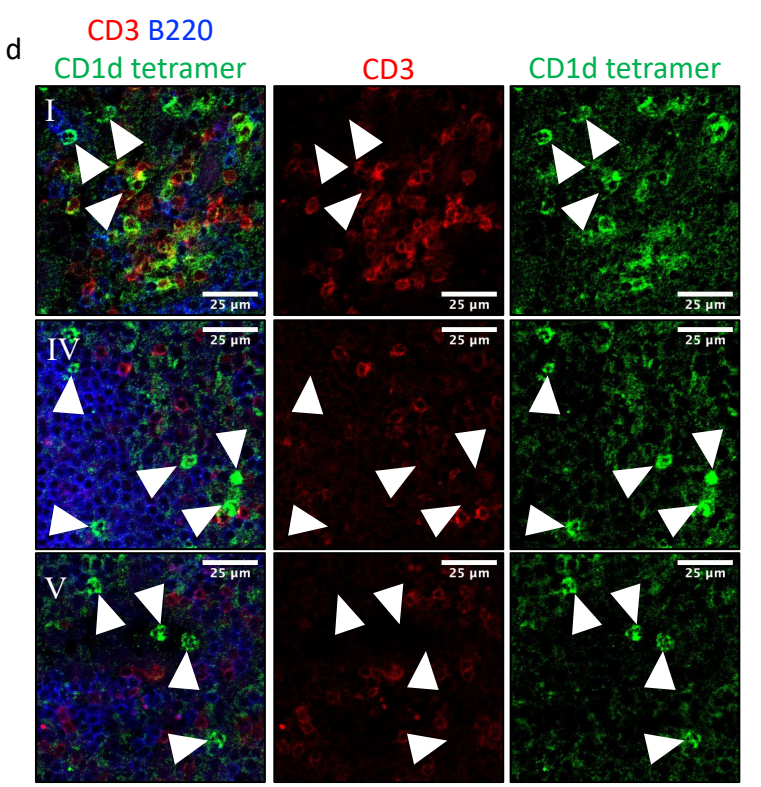

Supplementary Fig S3

a 7 week old 12 week old

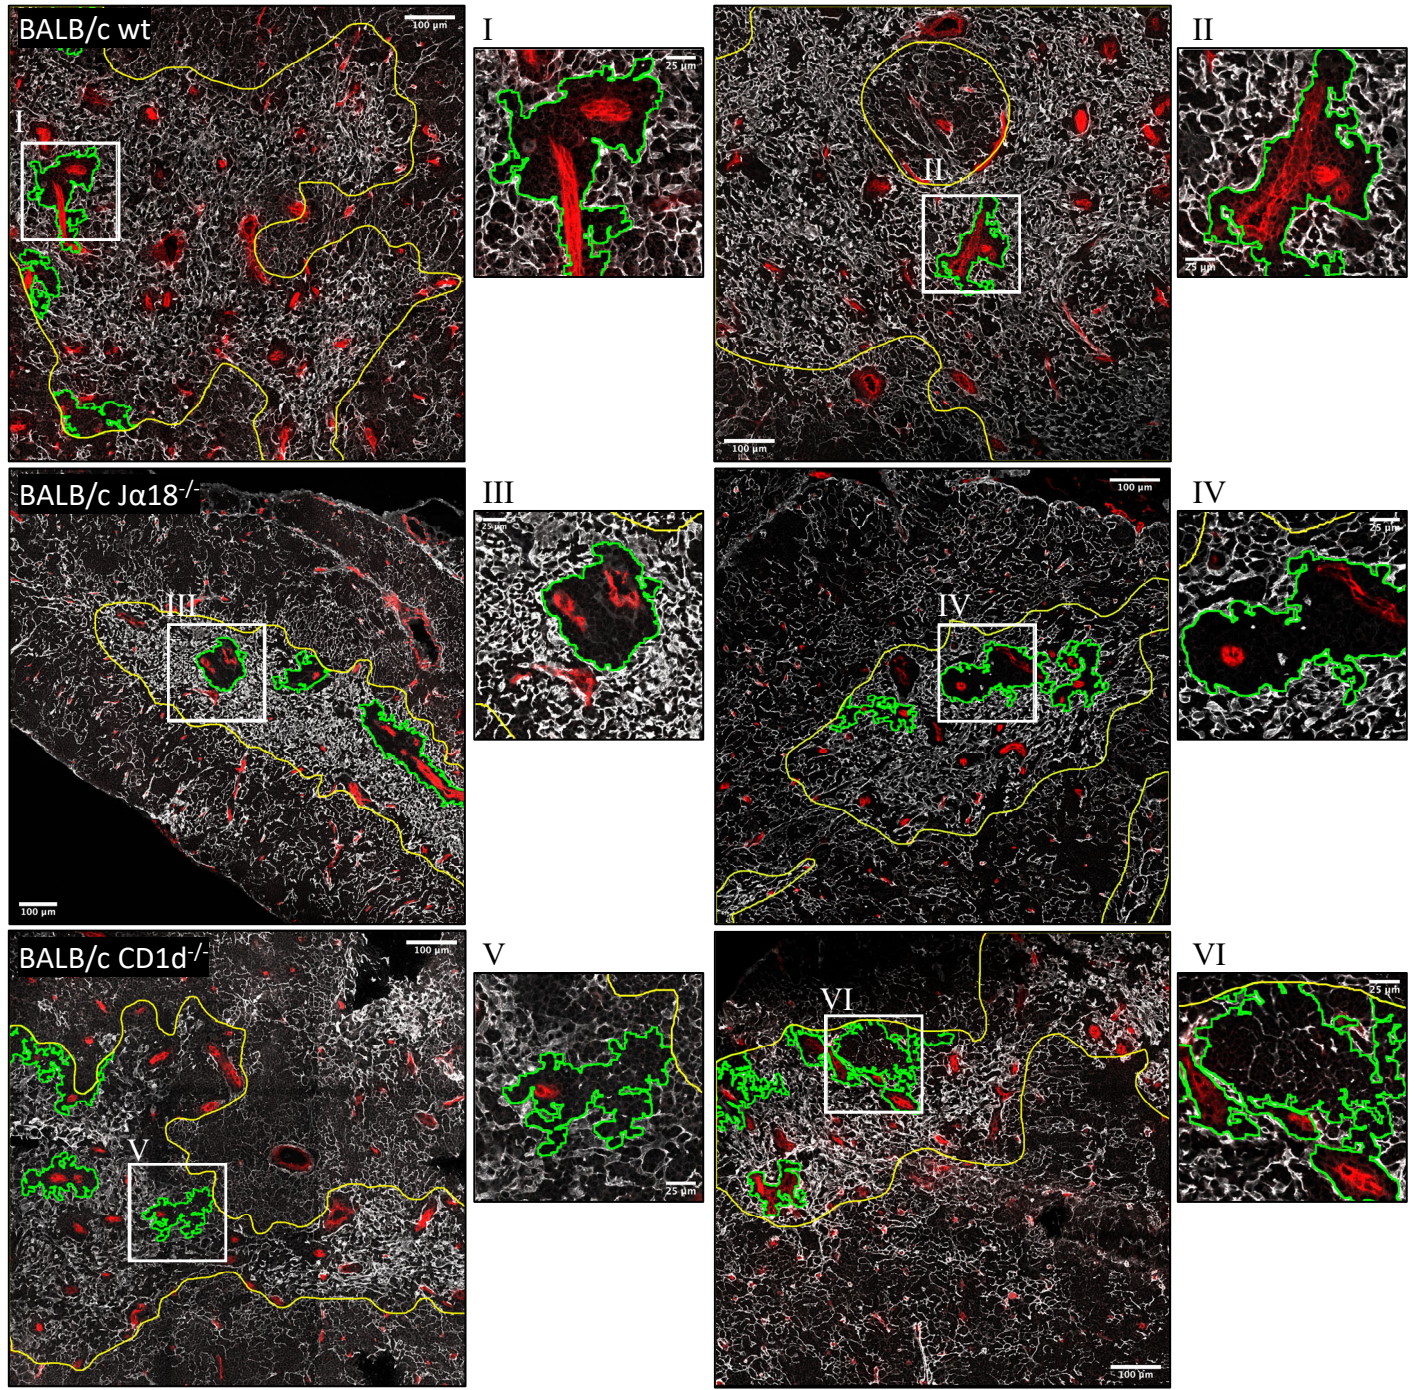

CD31 K5 Medulla Voids

Supplementary Fig S3 continued

b

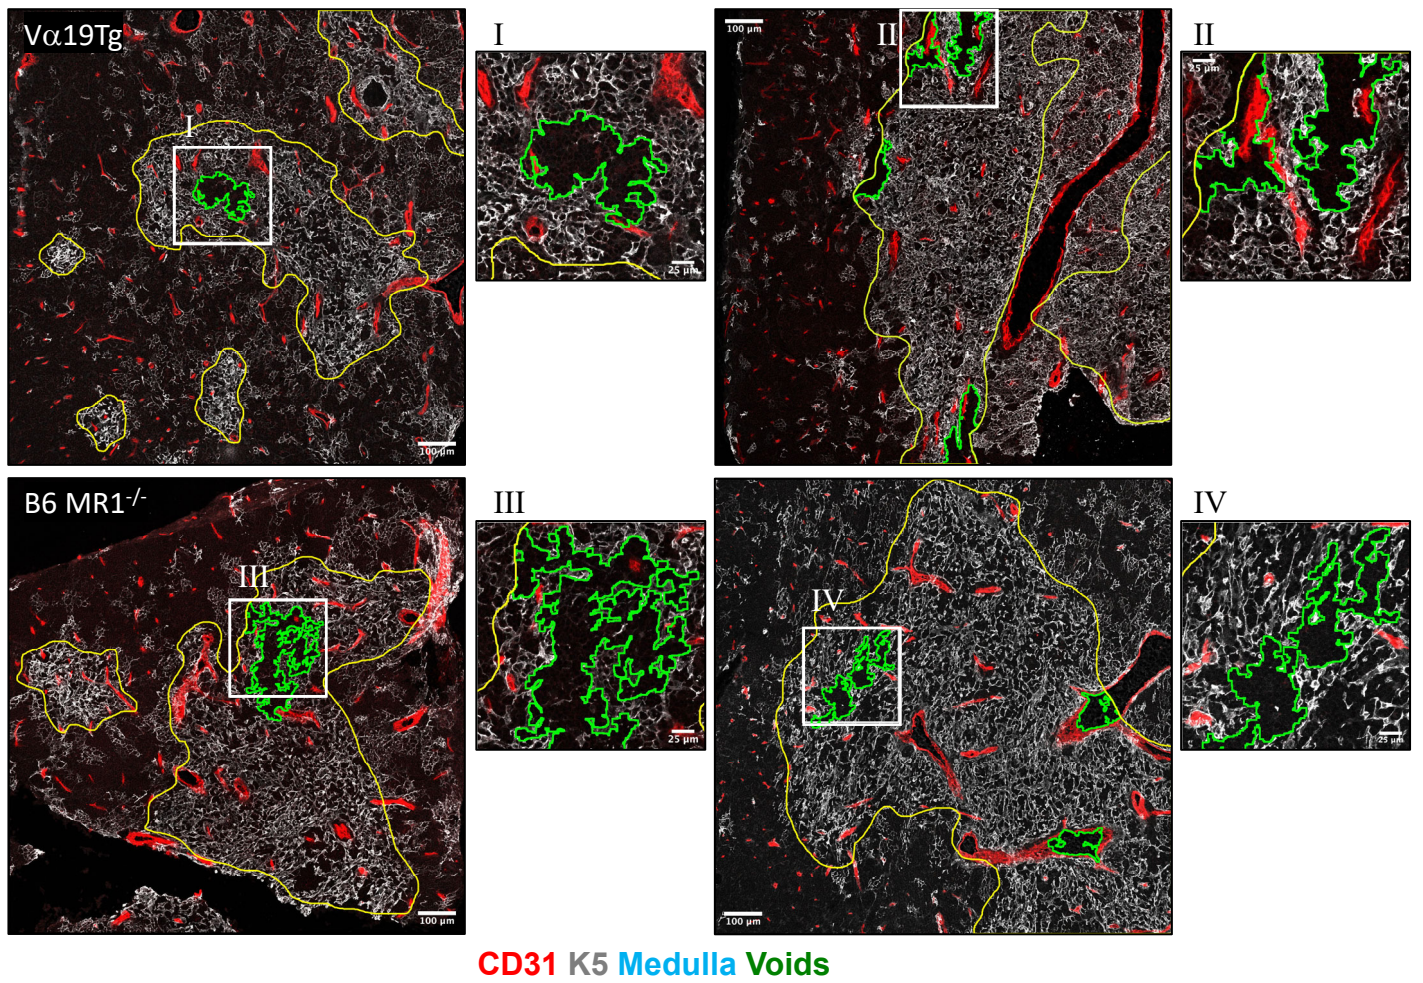

CD31 K5 Medulla Voids

c

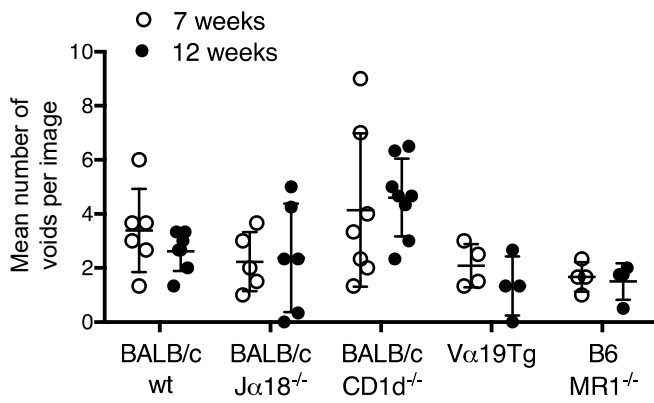

d

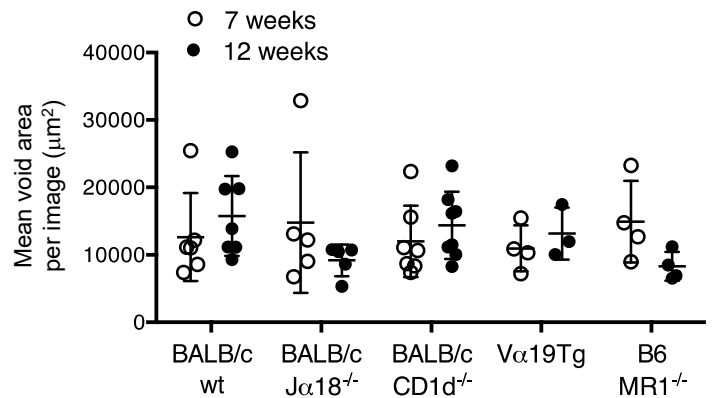



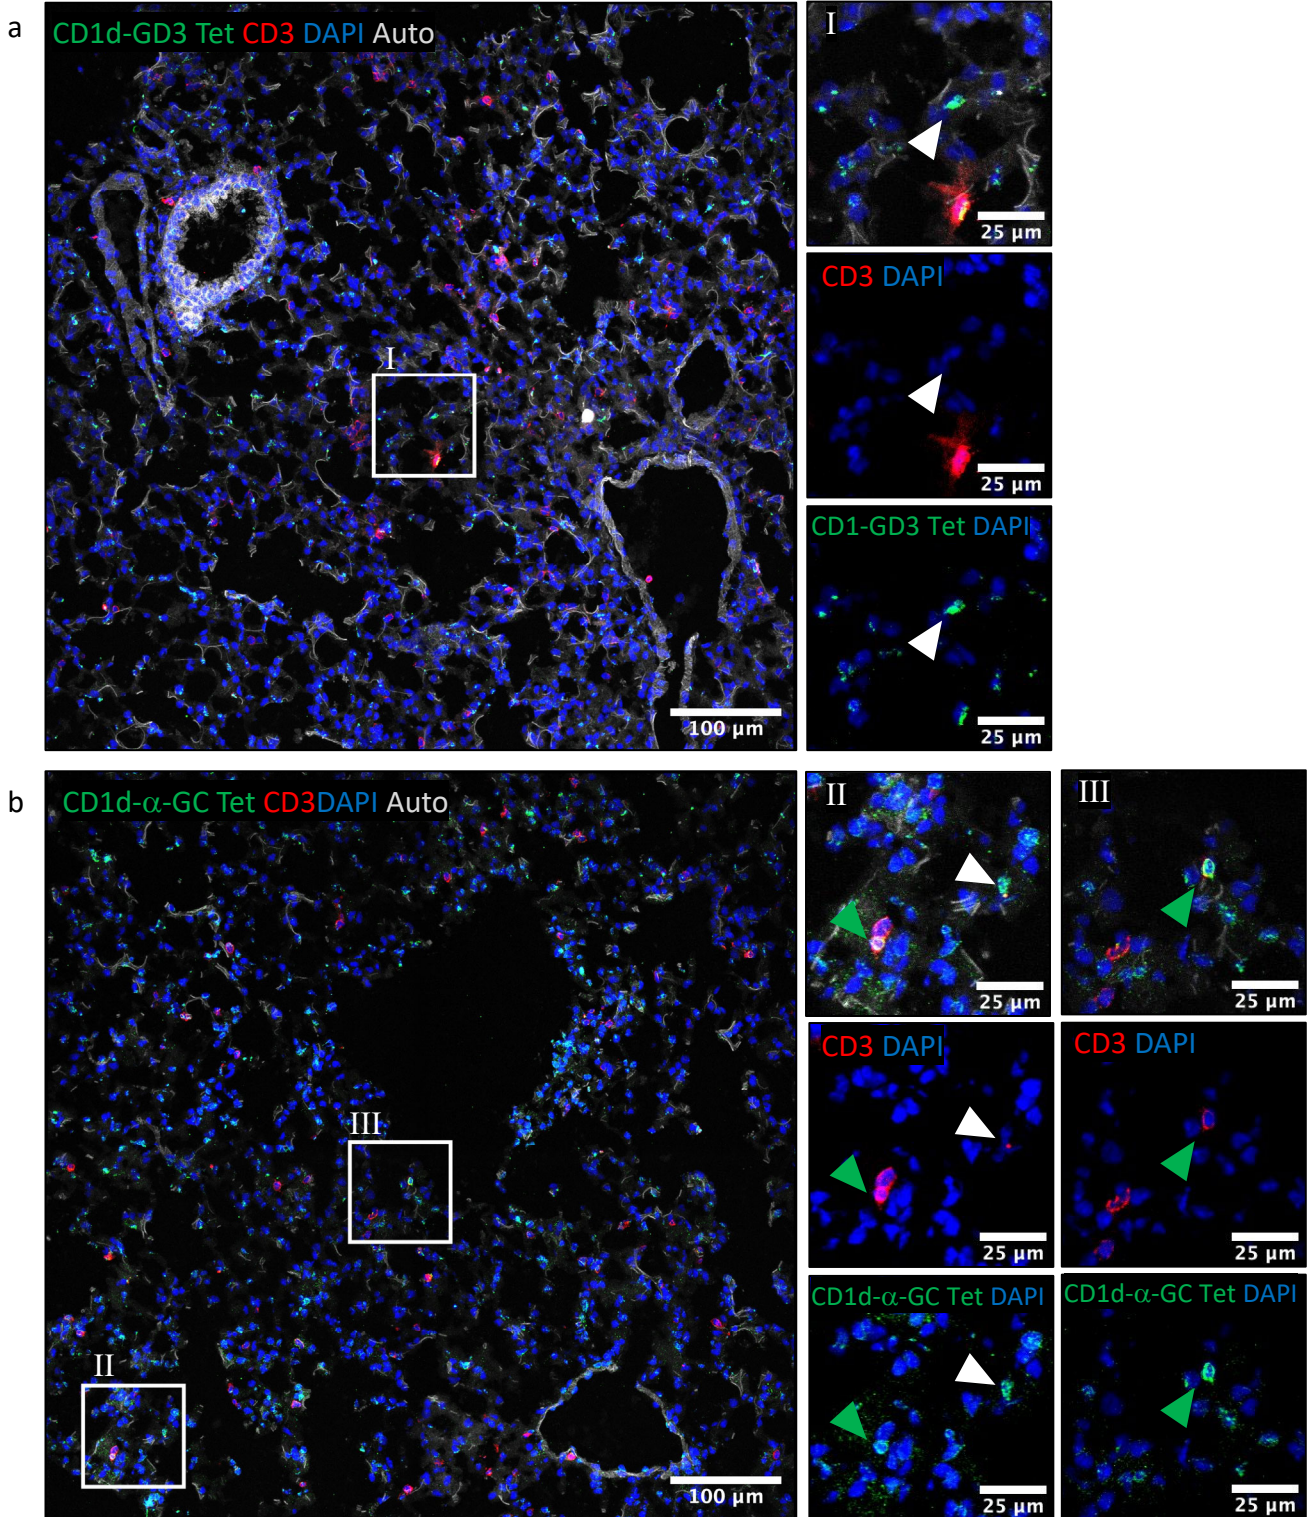

BALB/c wt Kidney

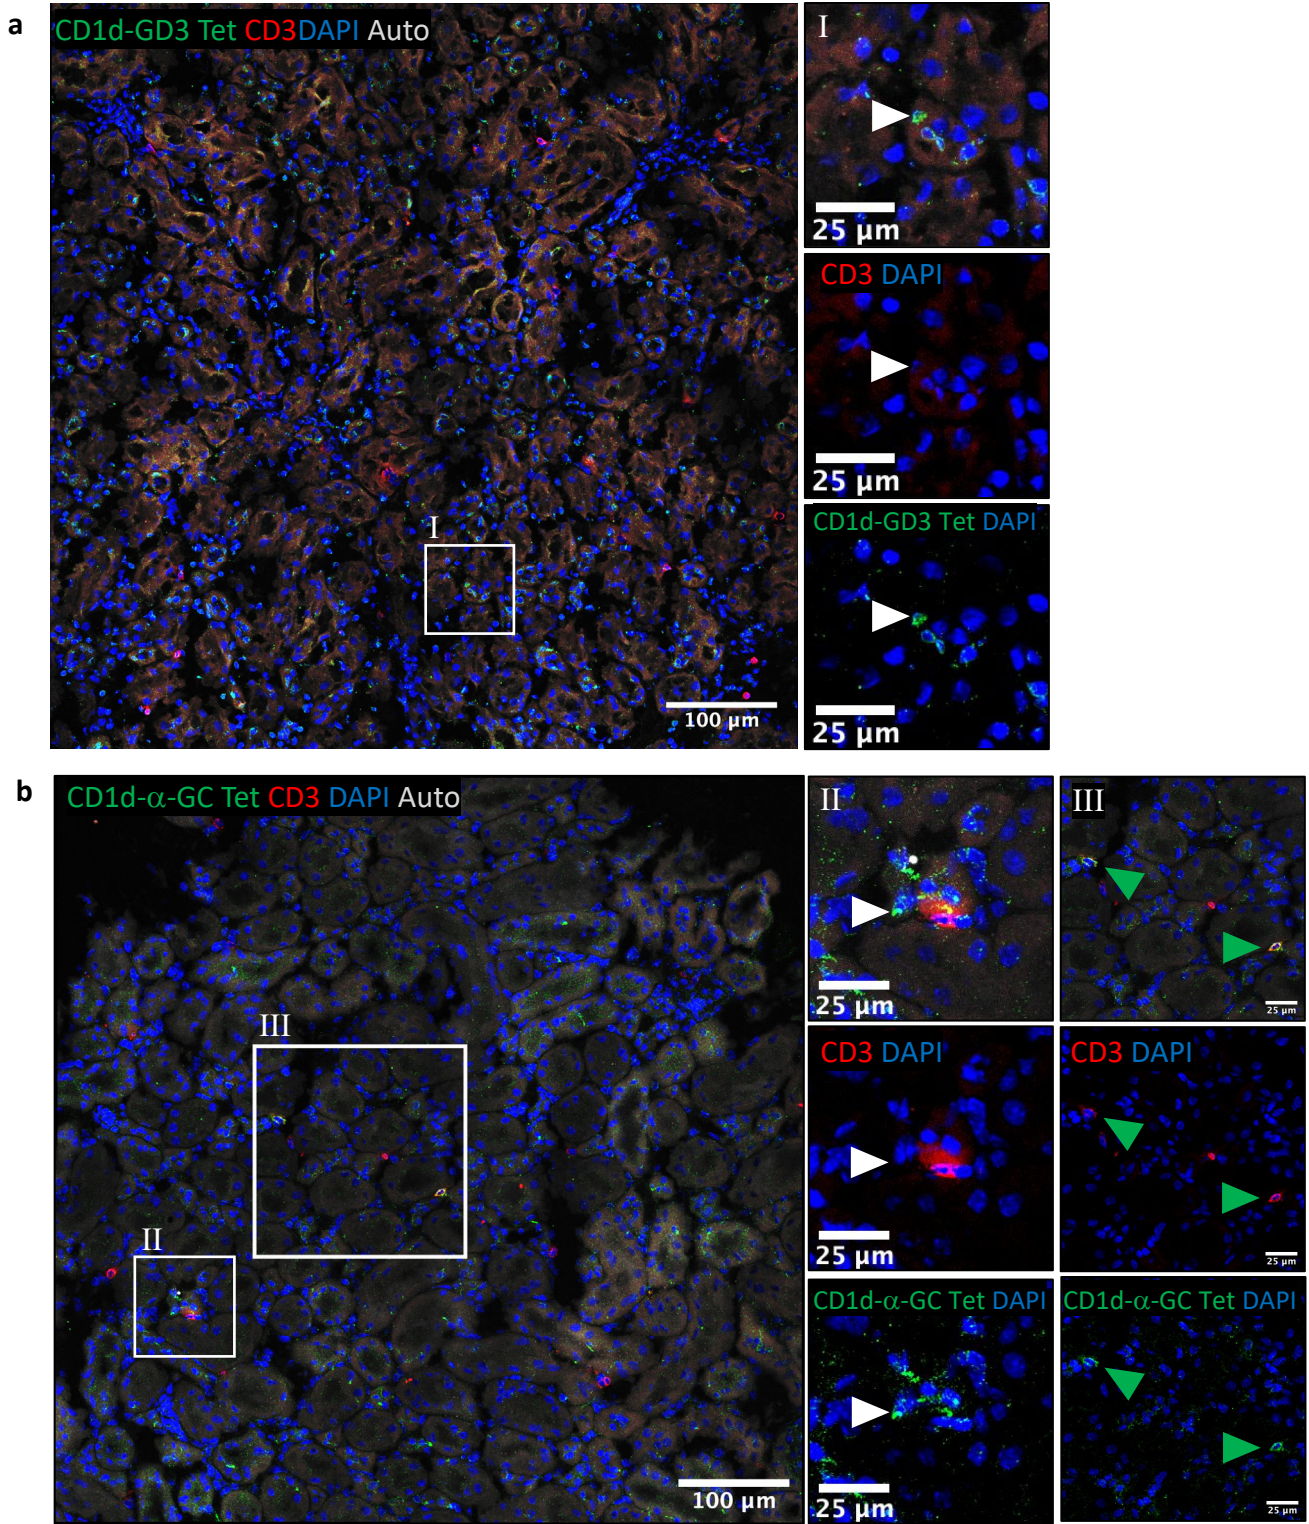

a

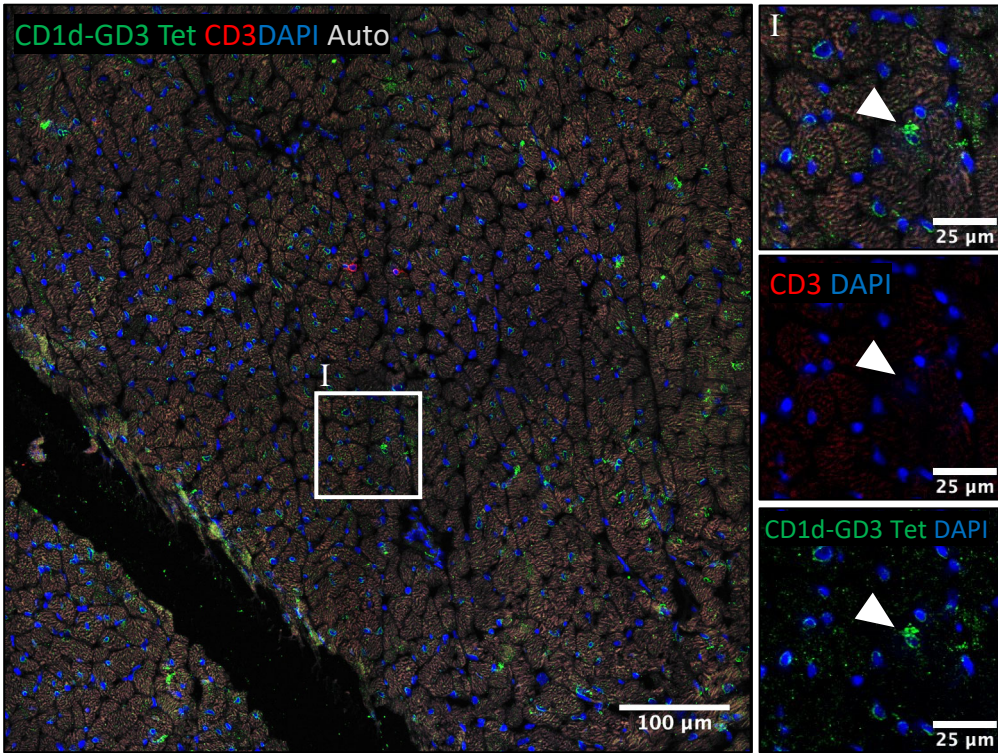

b

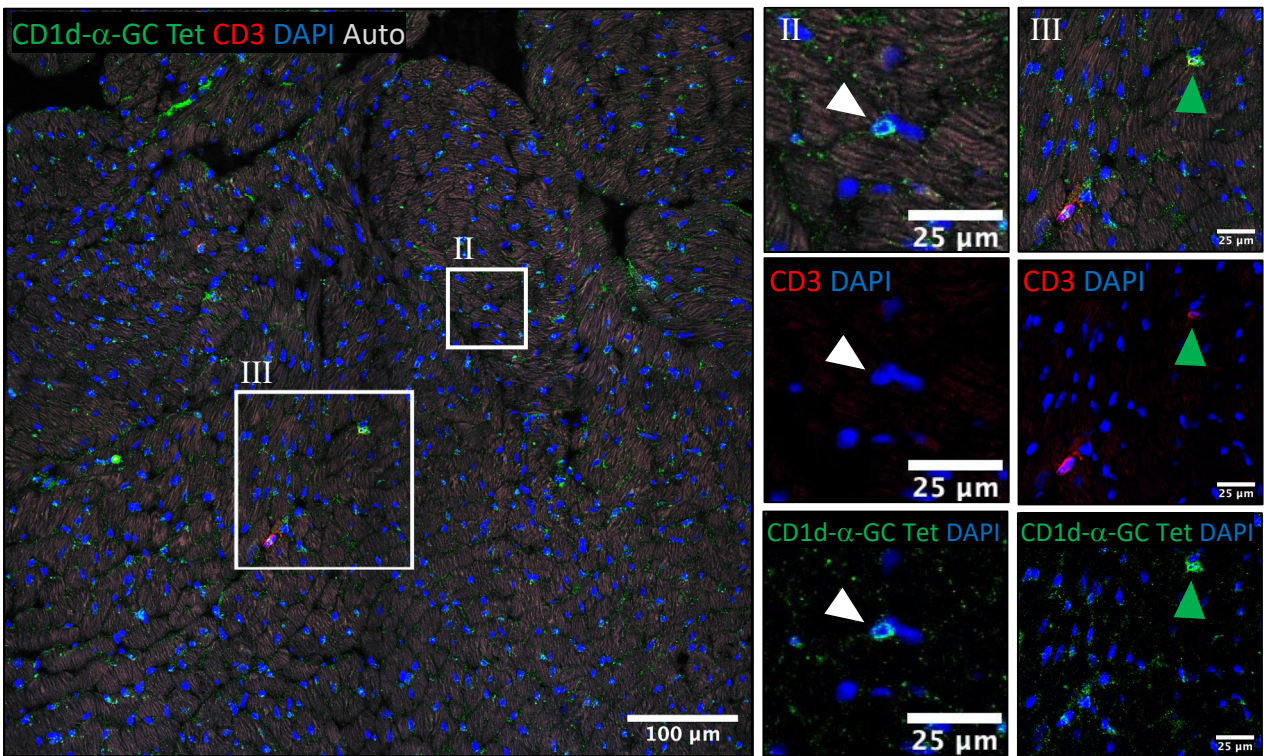



Supplementary  
Fig S8

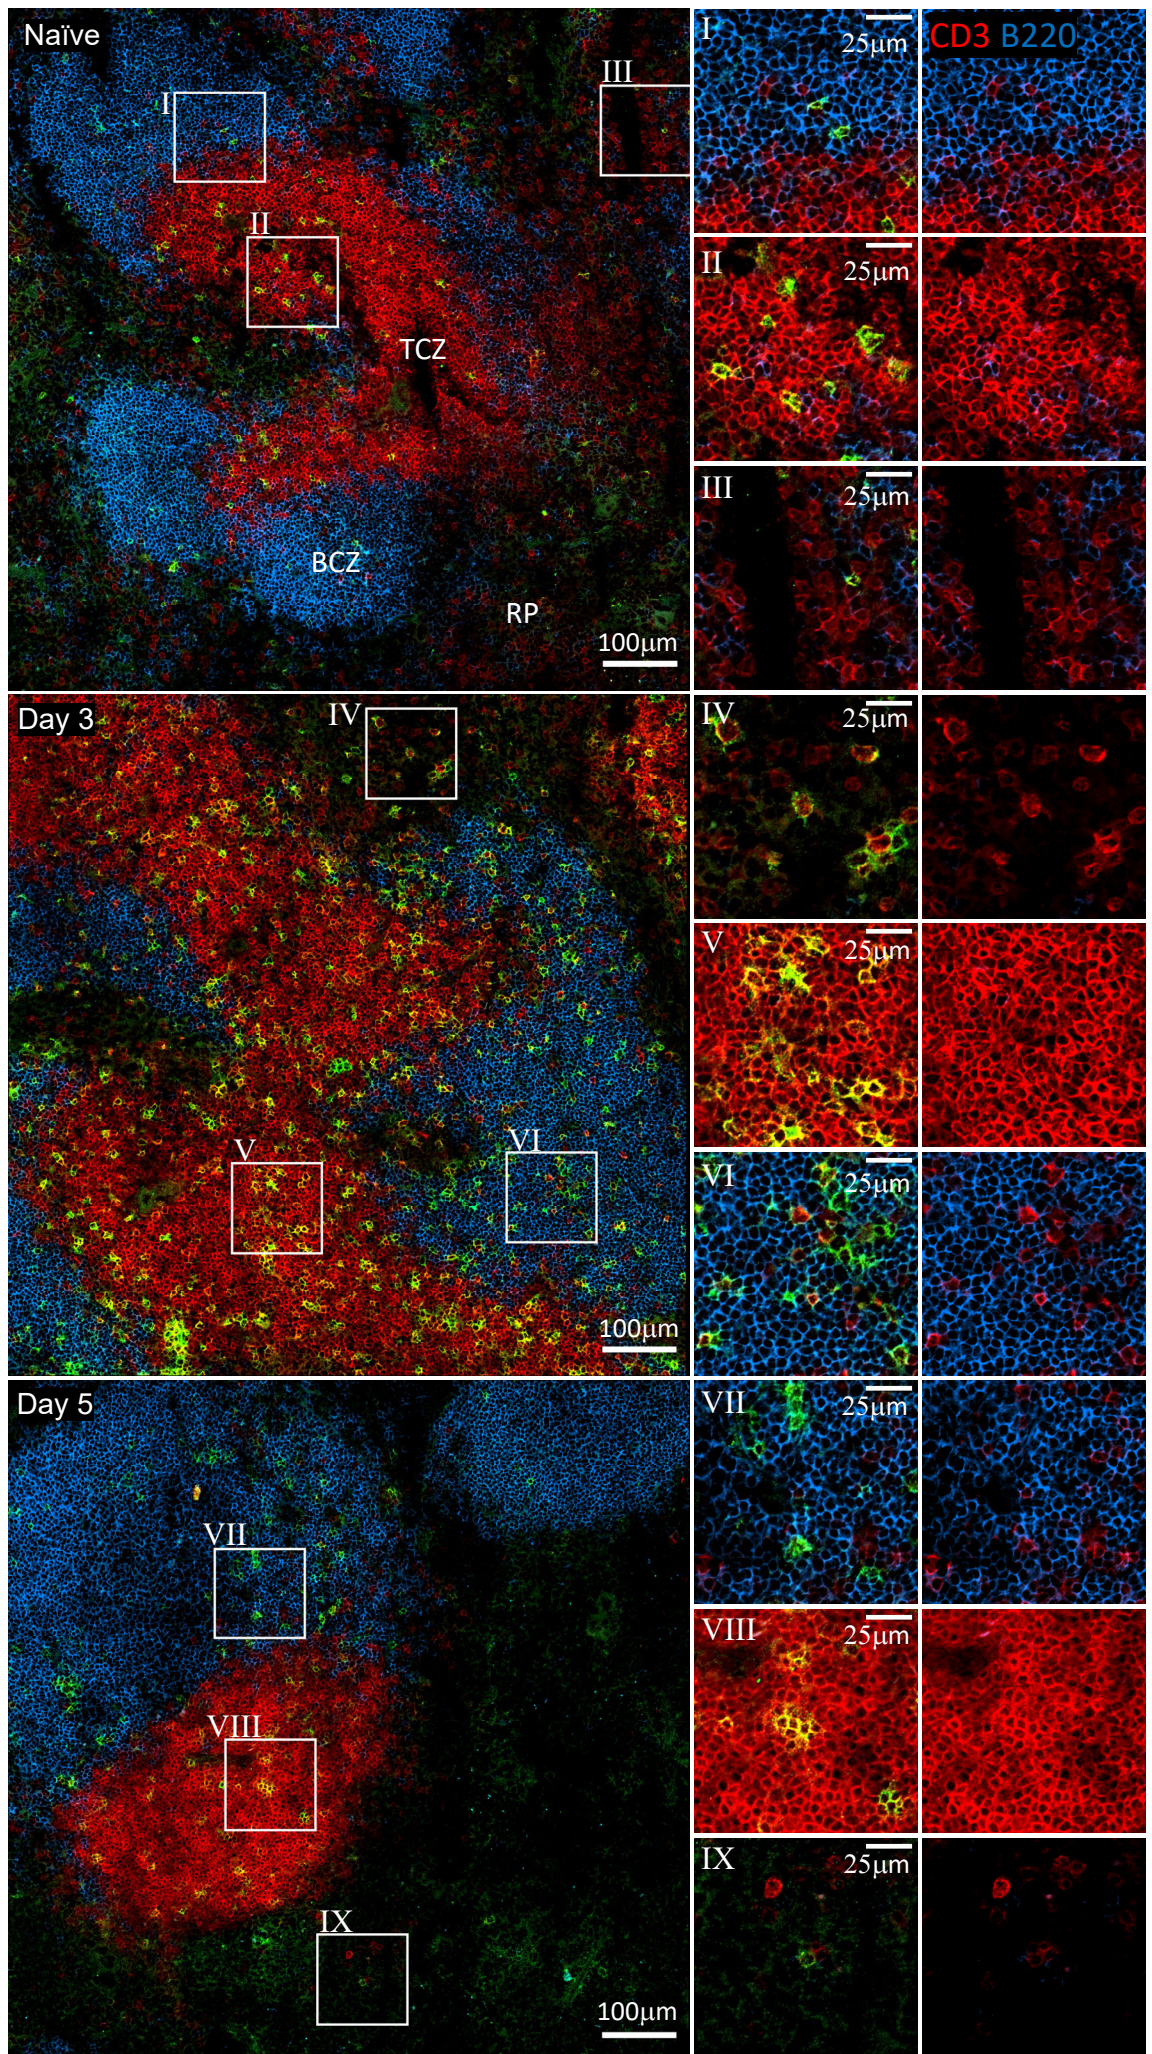

Supplementary Fig S9

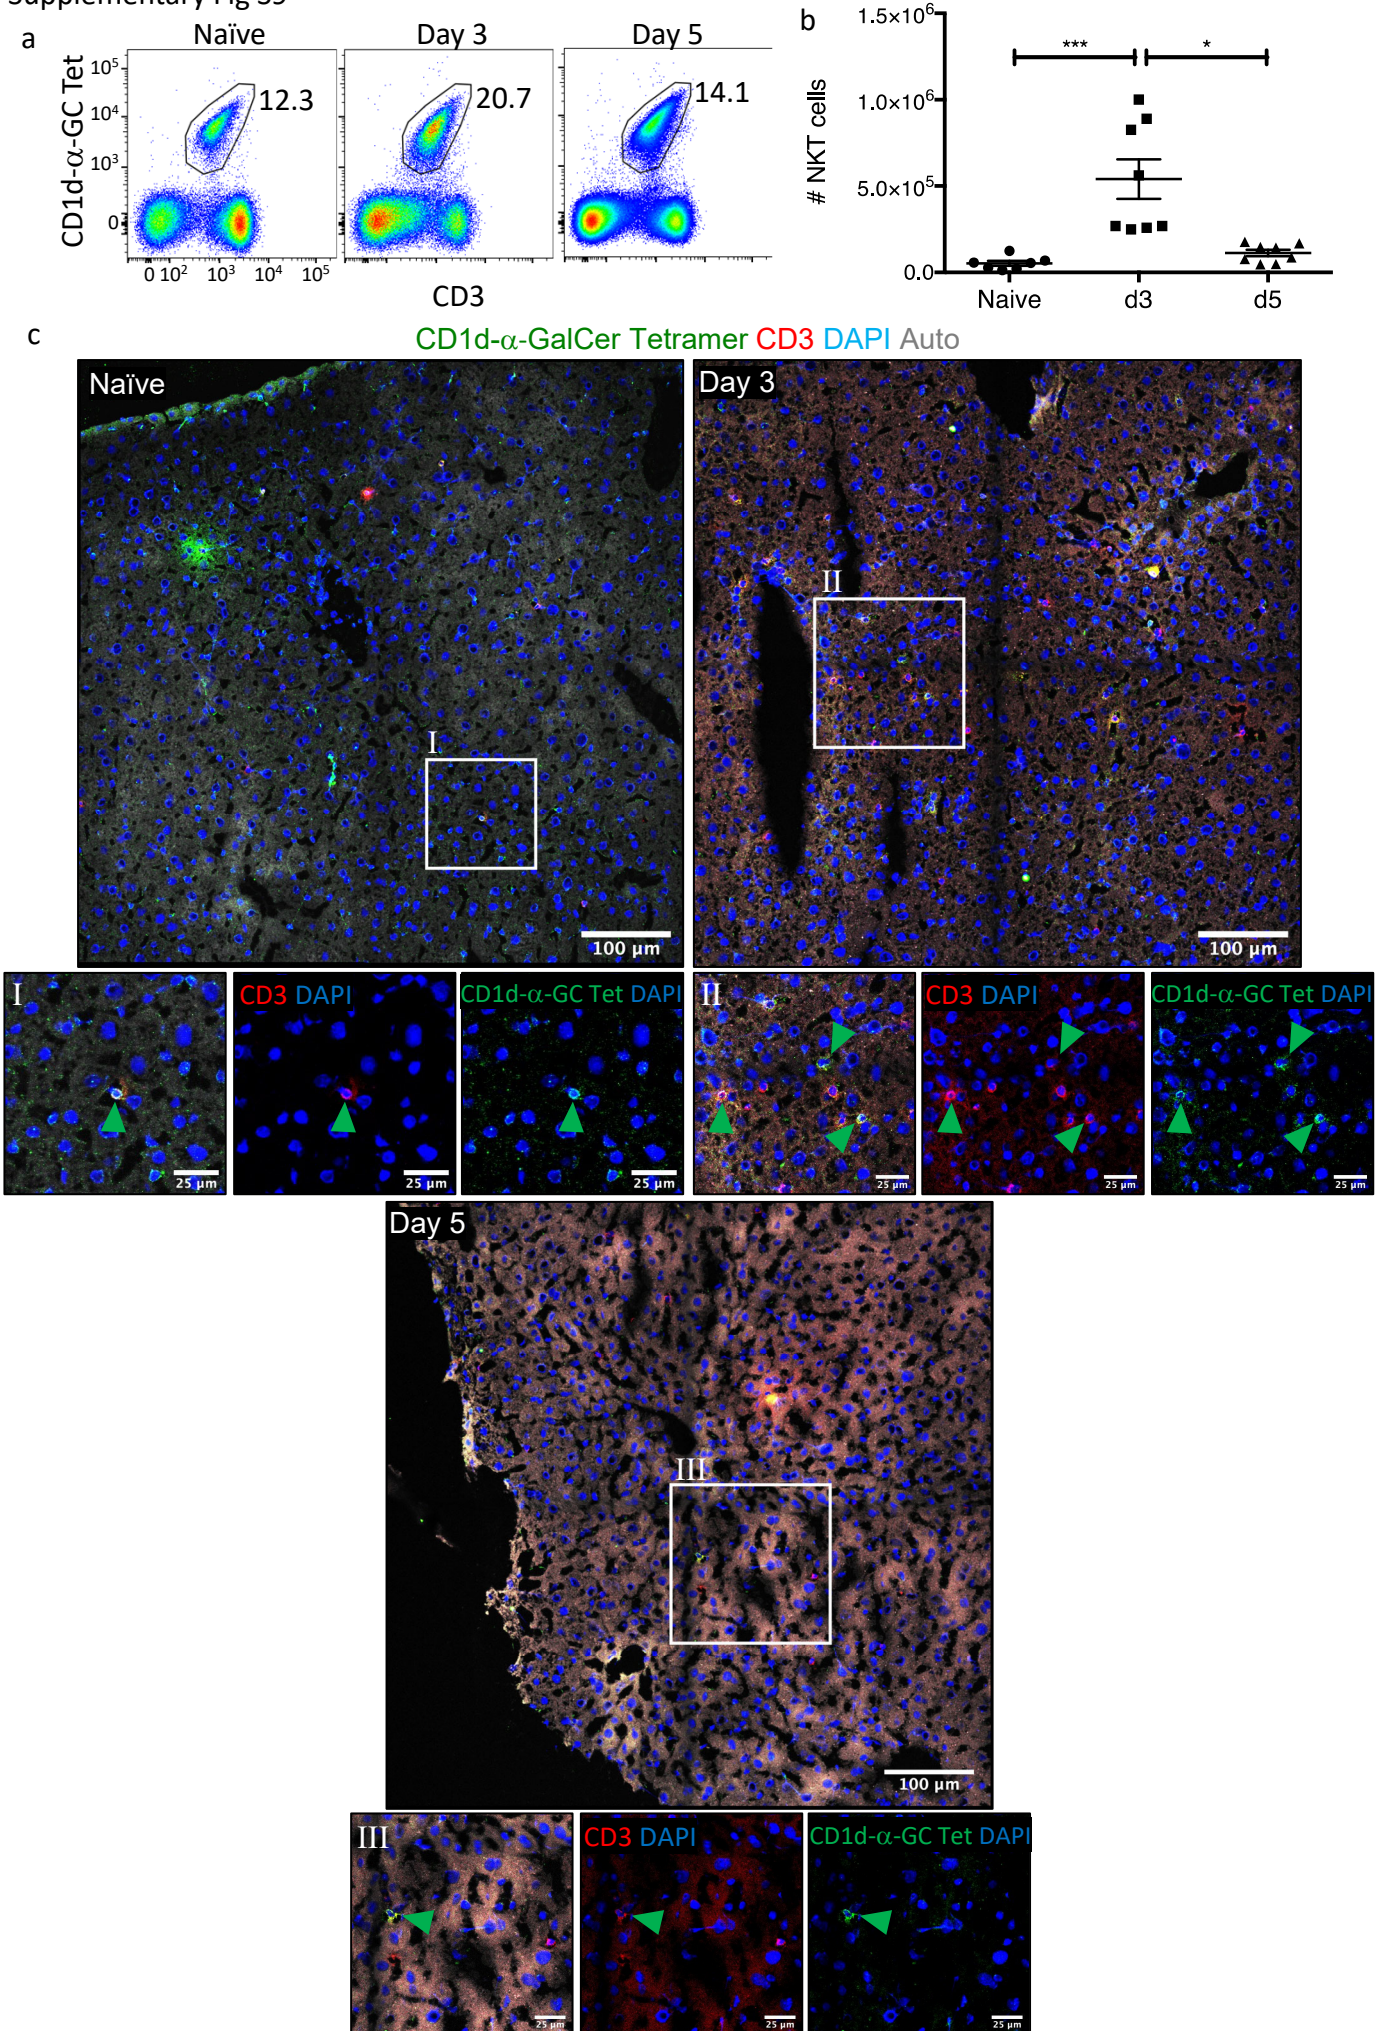

Supplementary Fig S9 continued

d

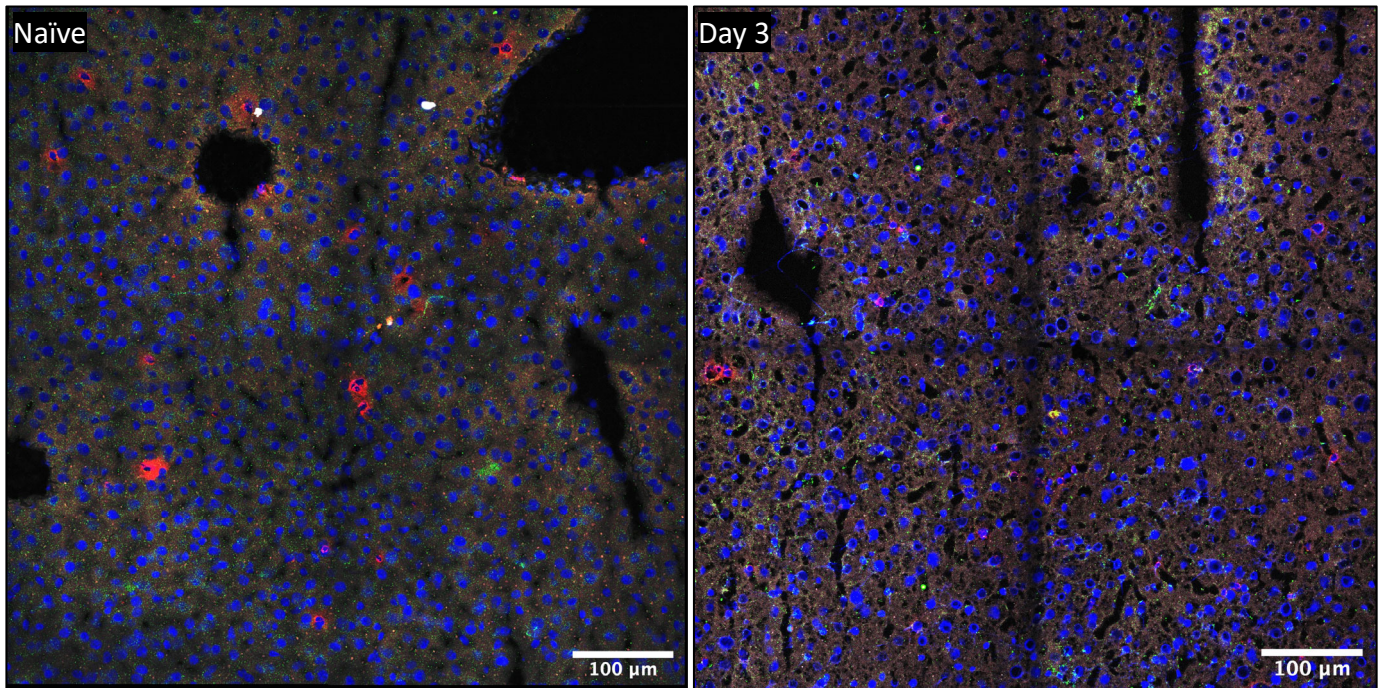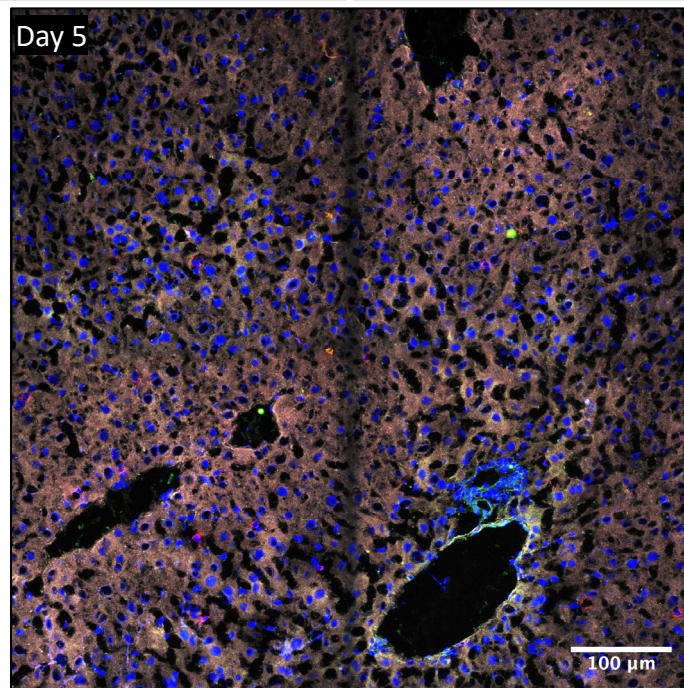

CD1d-GD3 Tetramer CD3 DAPI Auto

Supplementary Fig S10

a

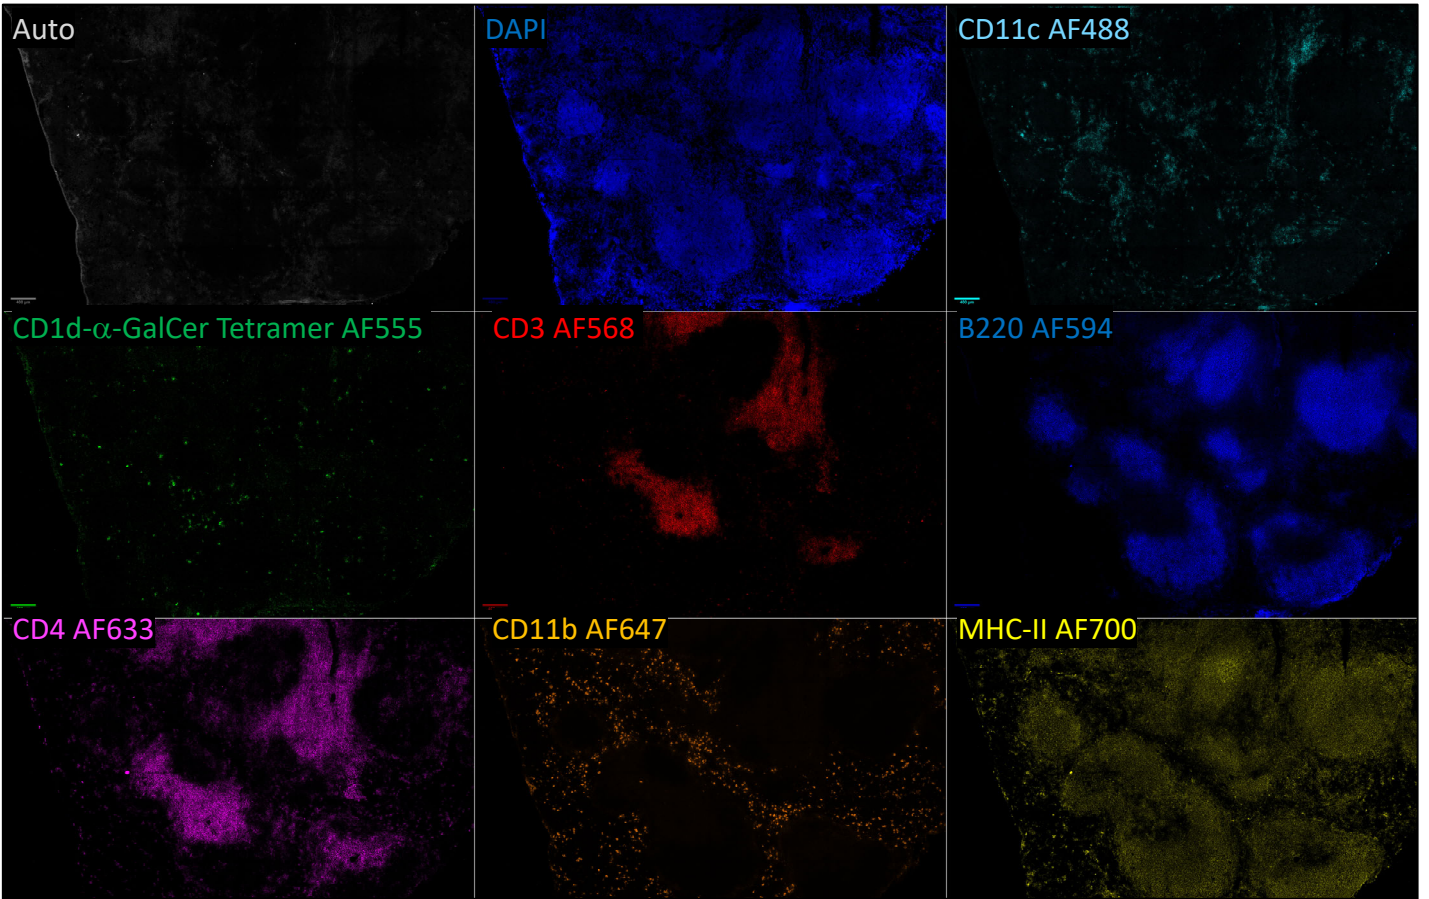

b

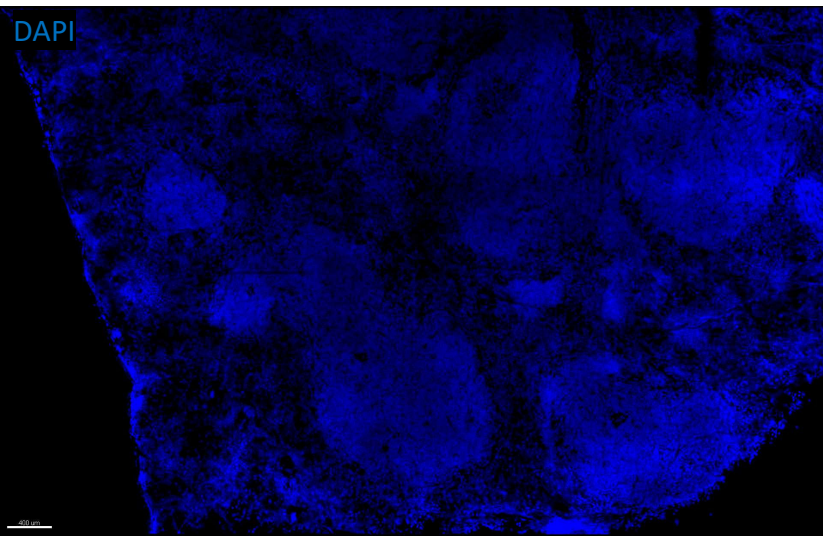

c

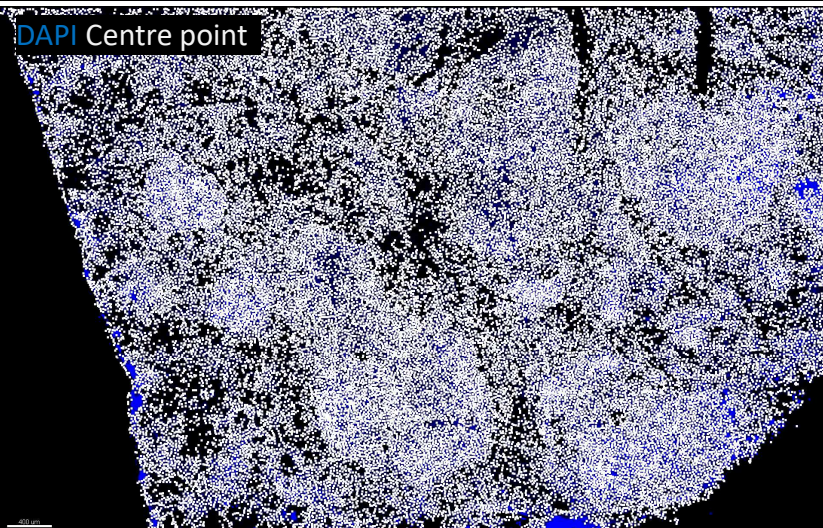

Supplementary Fig S10 continued

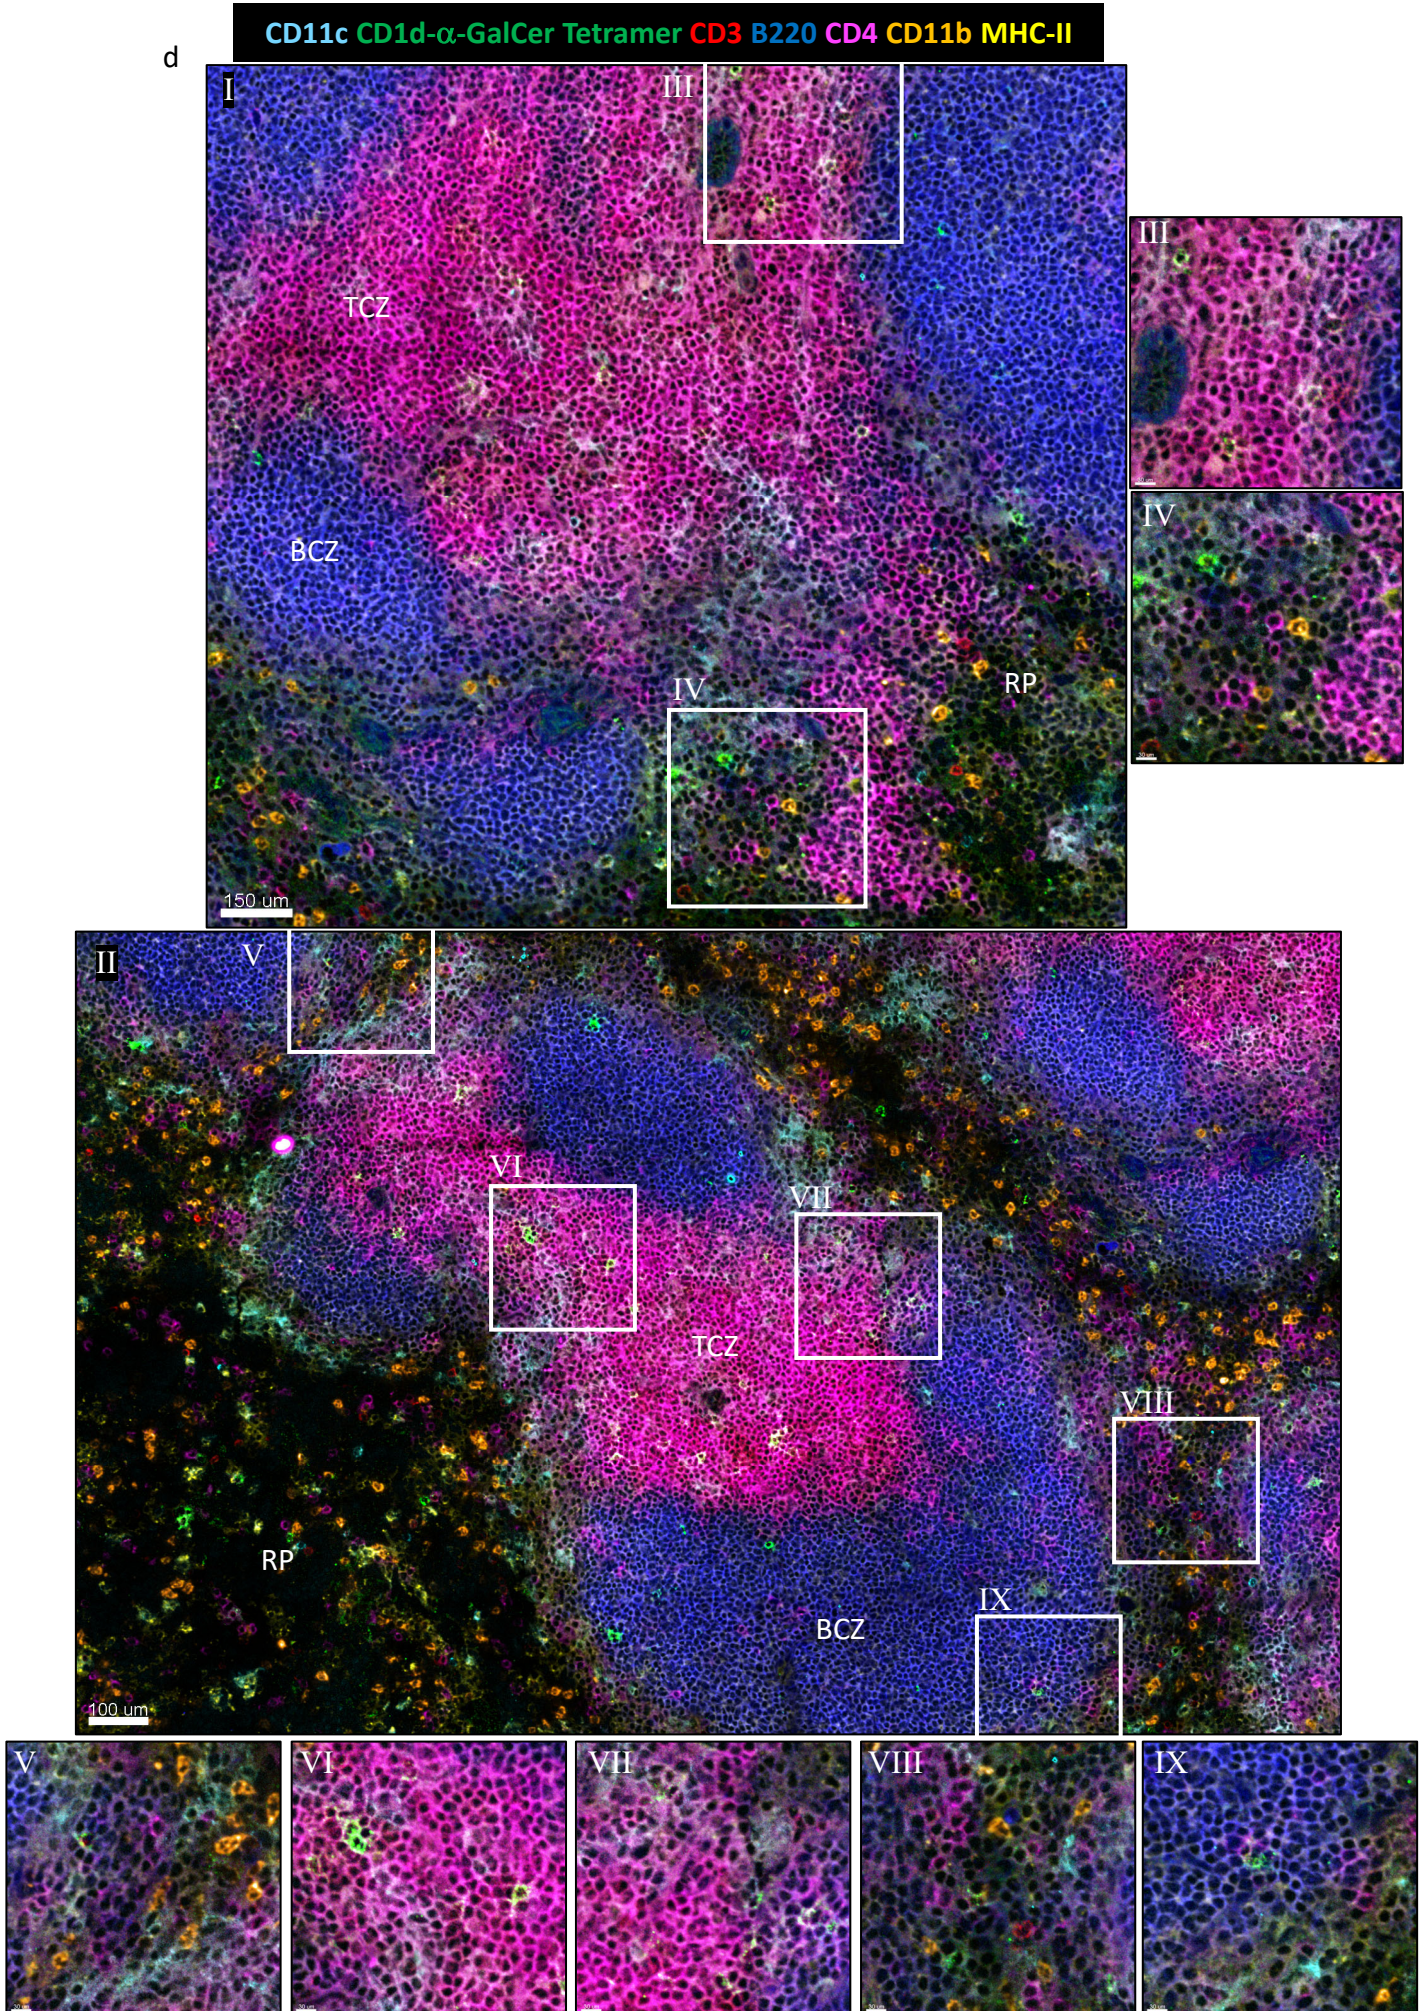



Supplementary Fig S11 continued

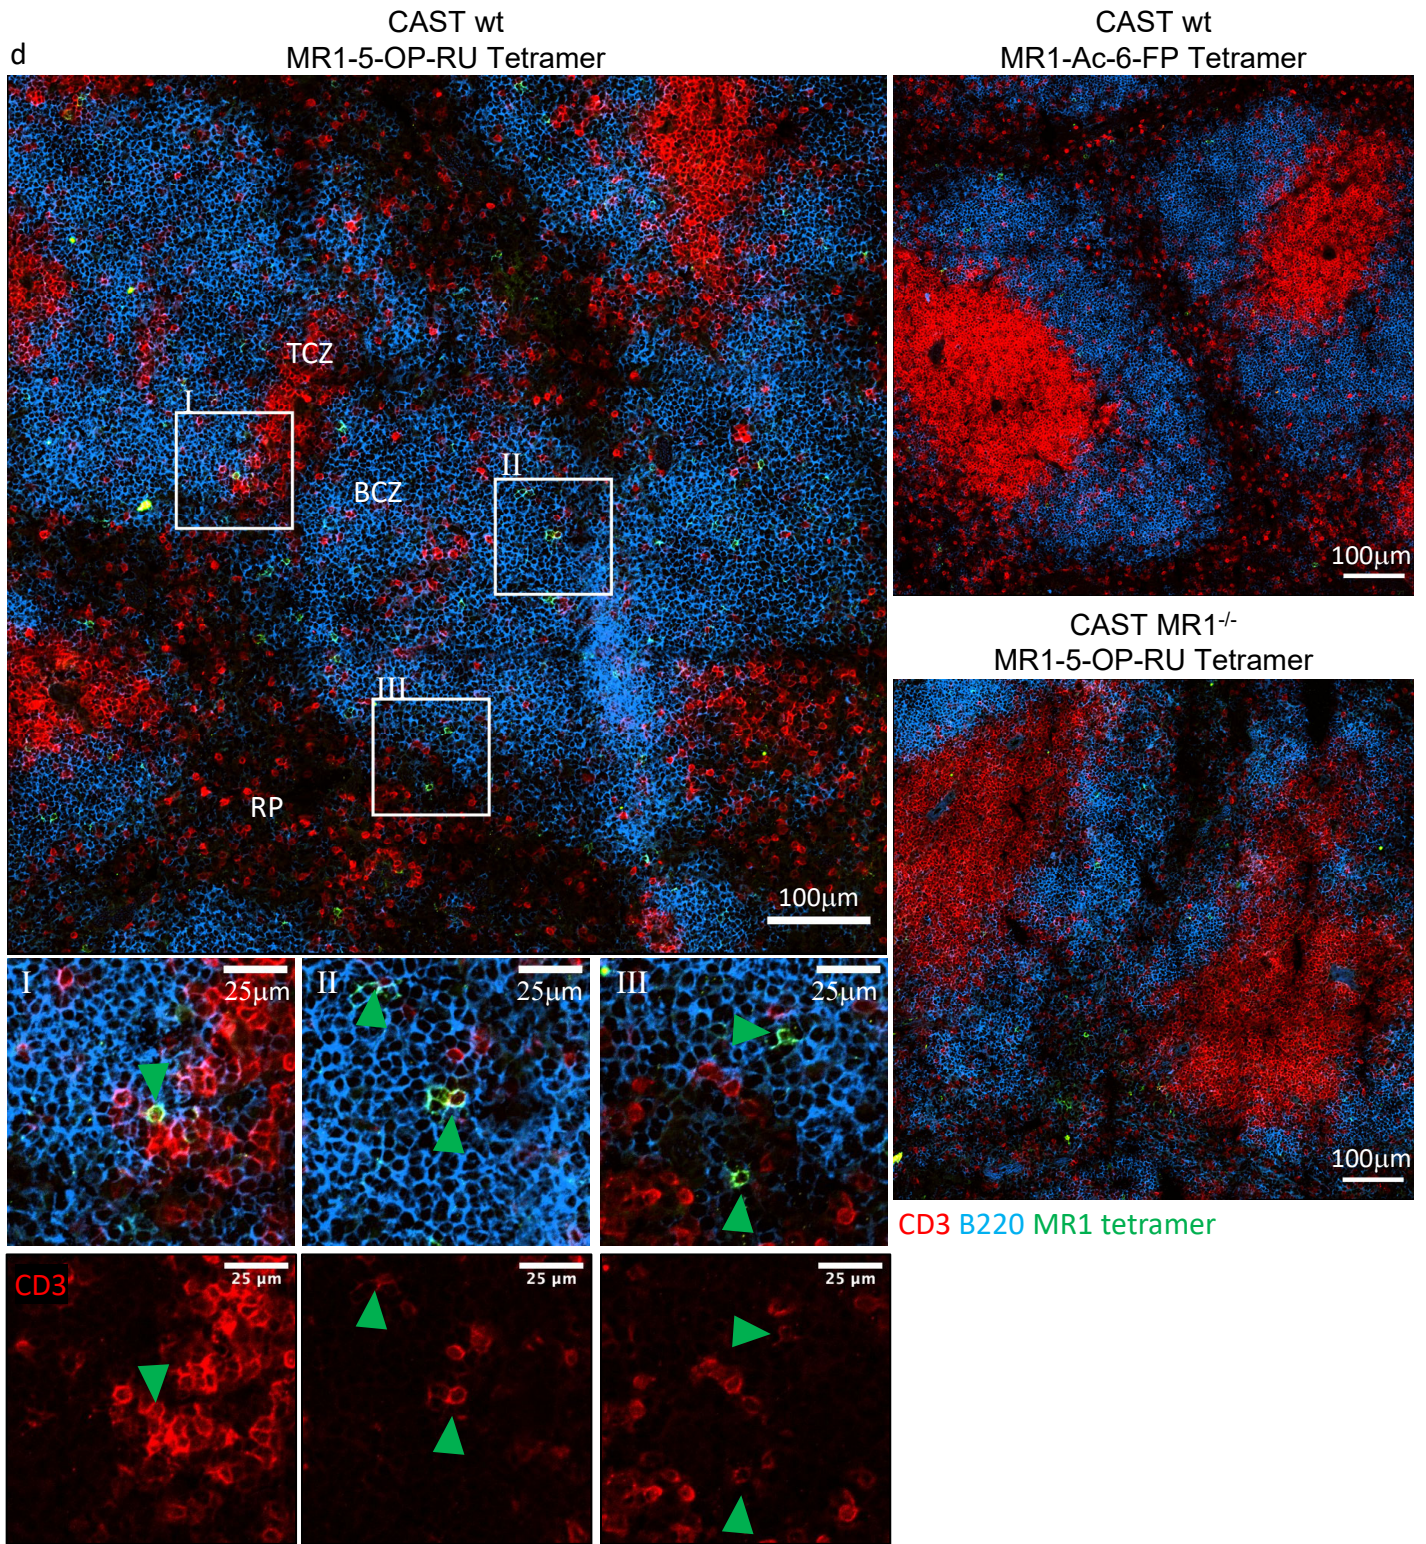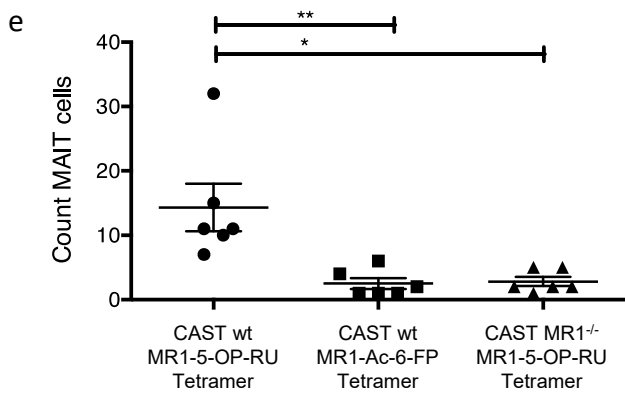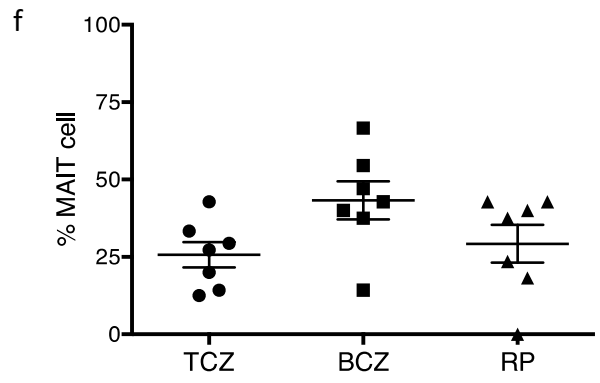

Supplementary Fig S12

a

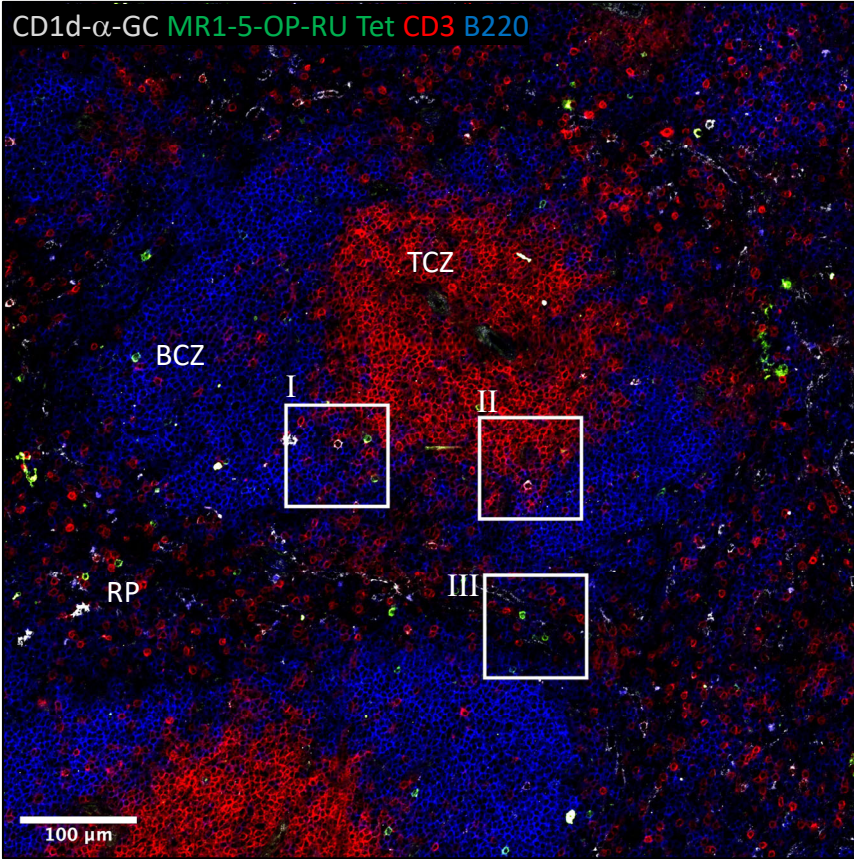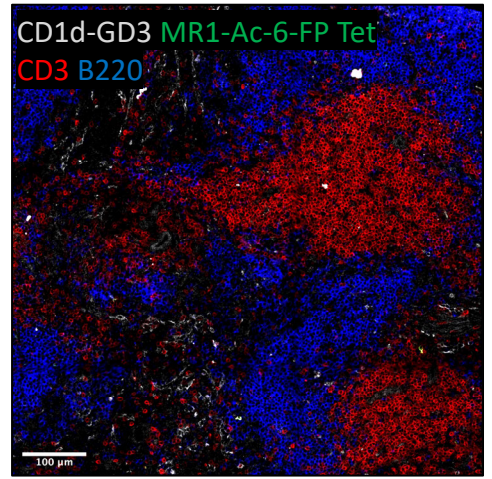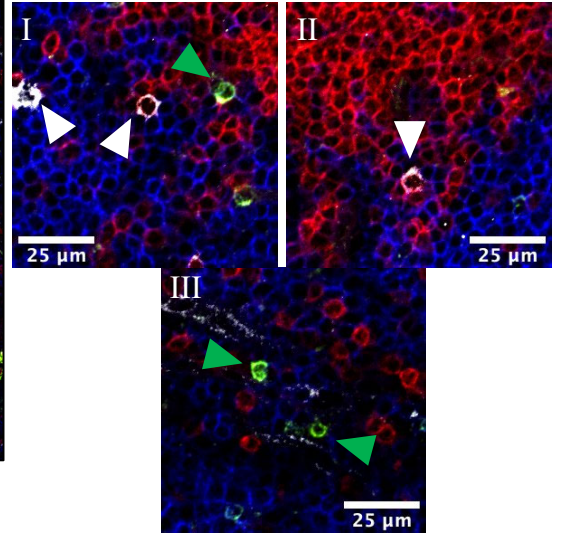

b

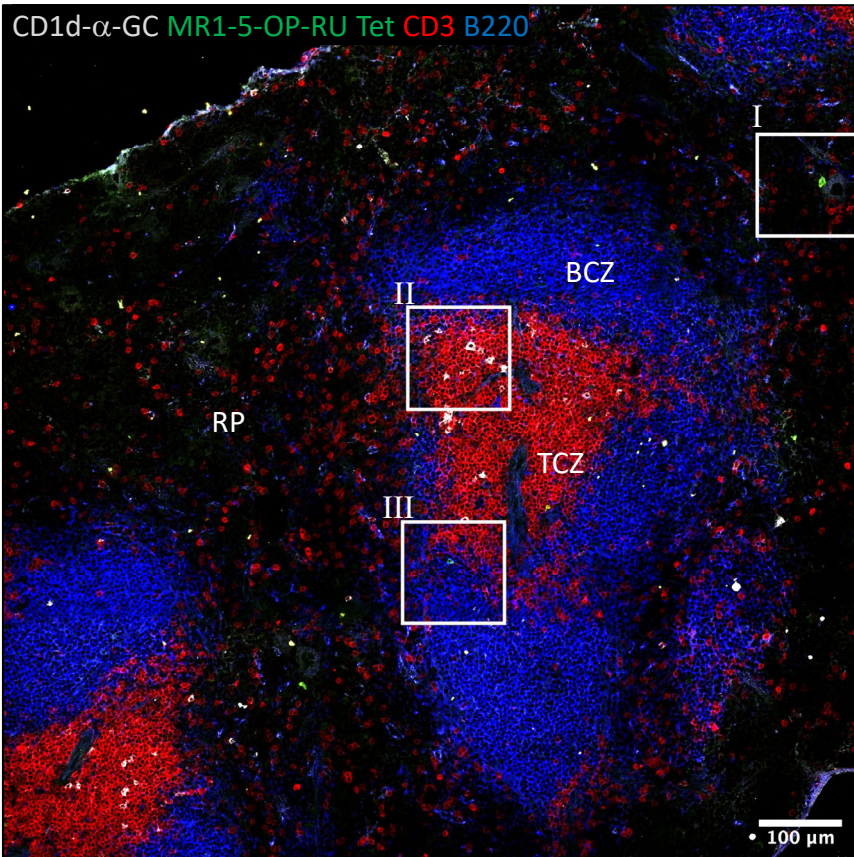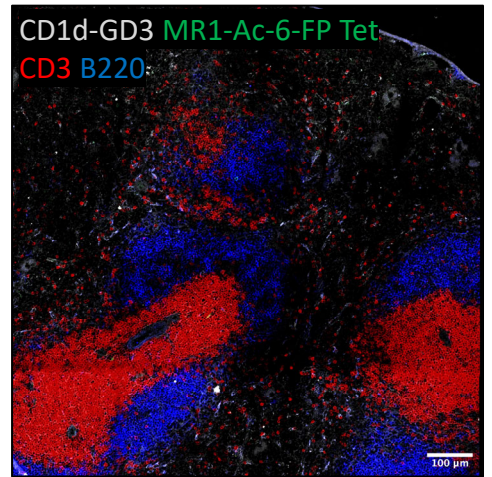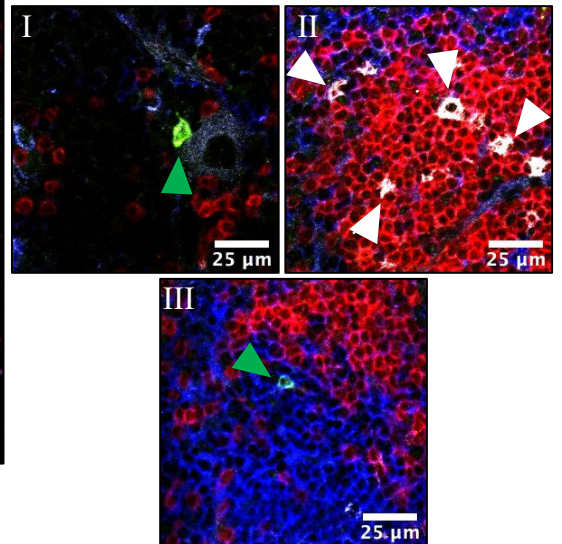



Supplementary Fig S13

a C57BL/6 wt MR1-5-OP-RU Tetramer

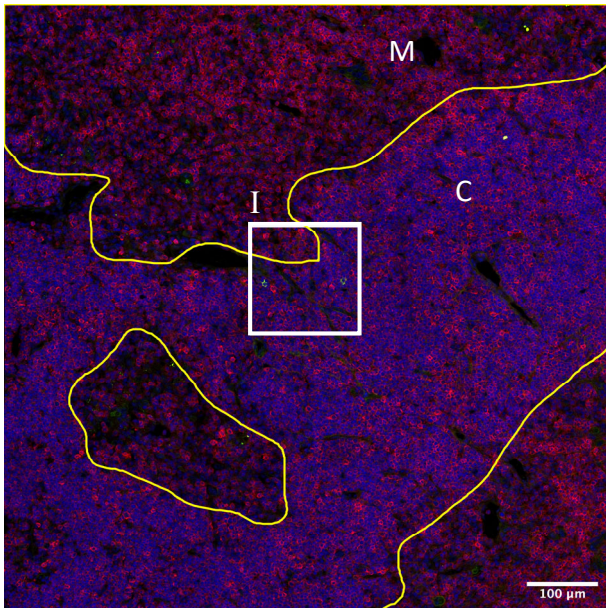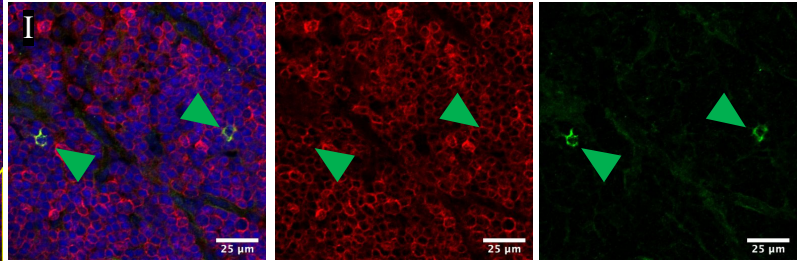

CD3 MR1-5-OP-RU Tetramer DAPI

C57BL/6 wt MR1-Ac-6-FP Tetramer

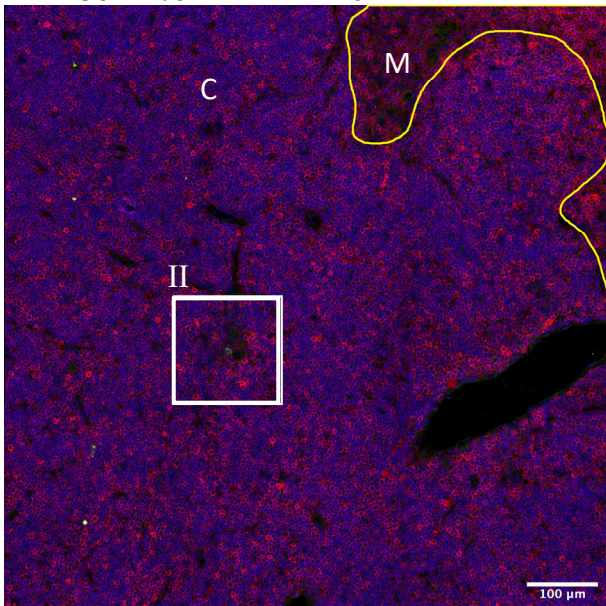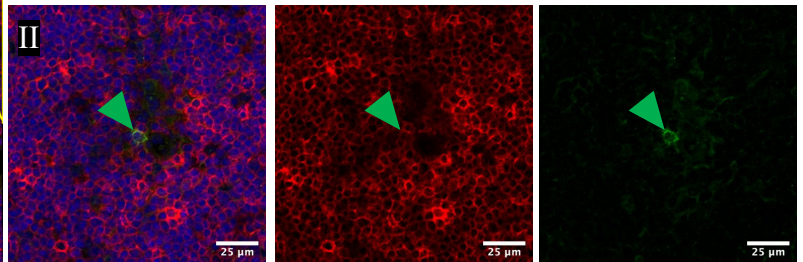

CD3 MR1-Ac-6-FP Tetramer DAPI

C57BL/6 MR1<sup>-/-</sup> MR1-5-OP-RU Tetramer

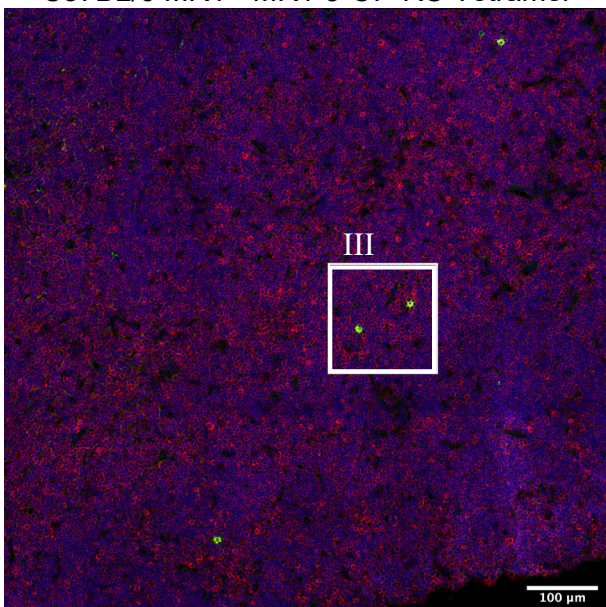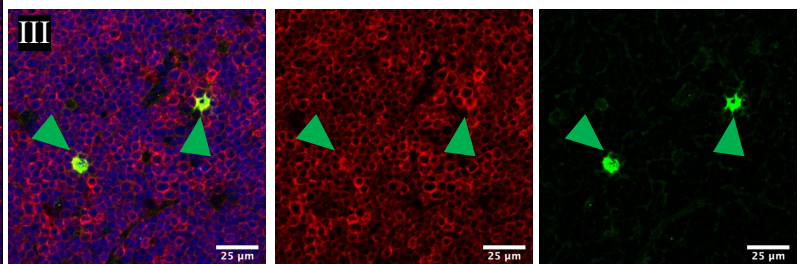

CD3 MR1-5-OP-RU Tetramer DAPI

Supplementary Fig S13 Continued

b BALB/c wt MR1-5-OP-RU Tetramer

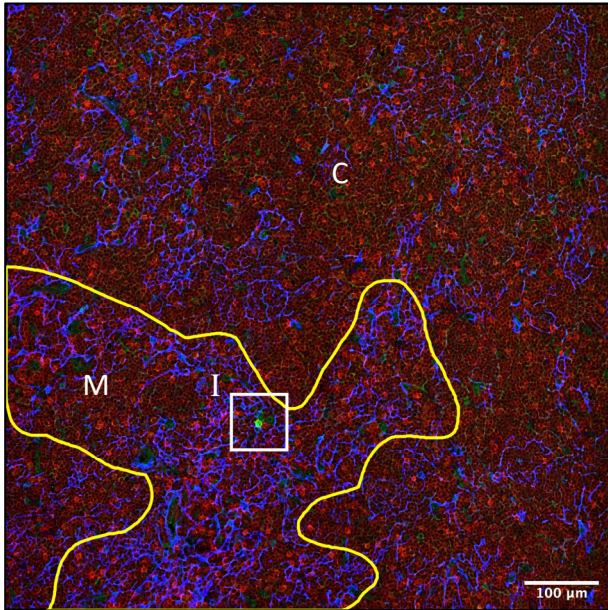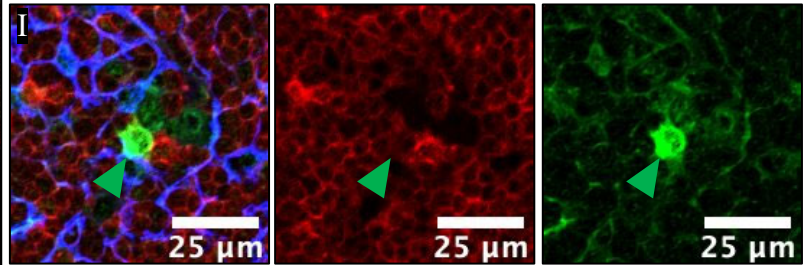

K5 CD3 MR1-5-OP-RU Tetramer

BALB/c wt MR1-Ac-6-FP Tetramer

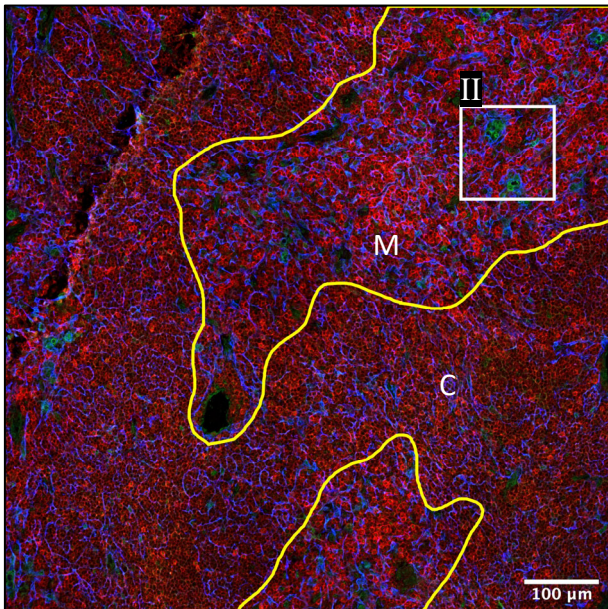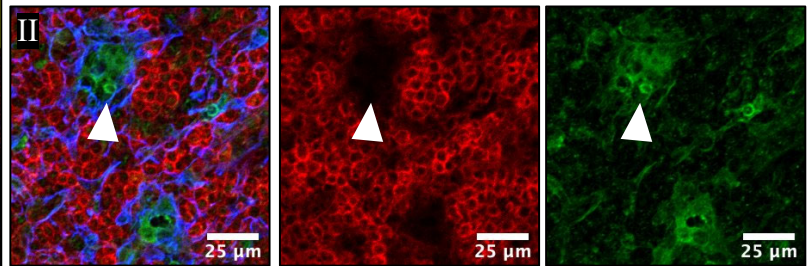

K5 CD3 MR1-Ac-6-FP Tetramer

**c** CAST wt MR1-5-OP-RU Tetramer

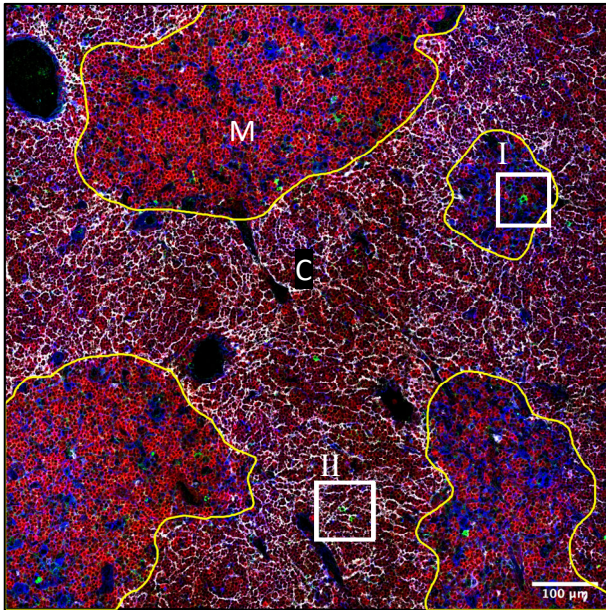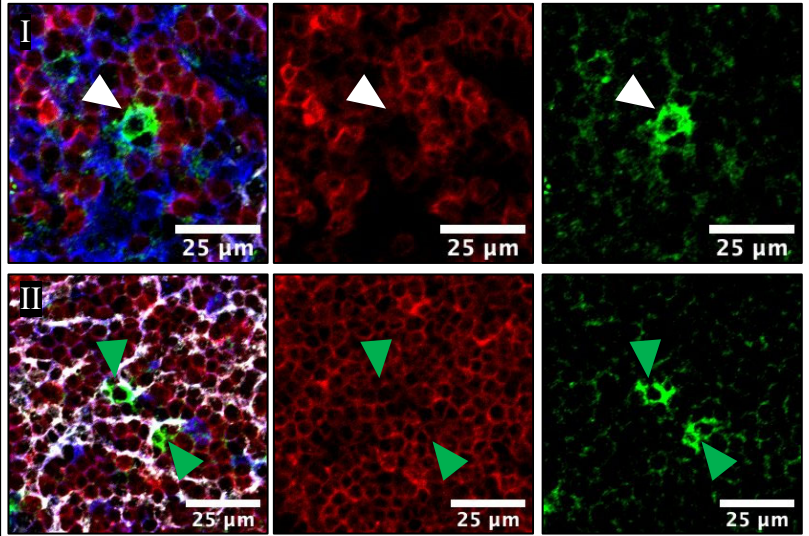

CD205 K5 CD3 MR1-5-OP-RU Tetramer

CAST wt MR1-Ac-6-FP Tetramer

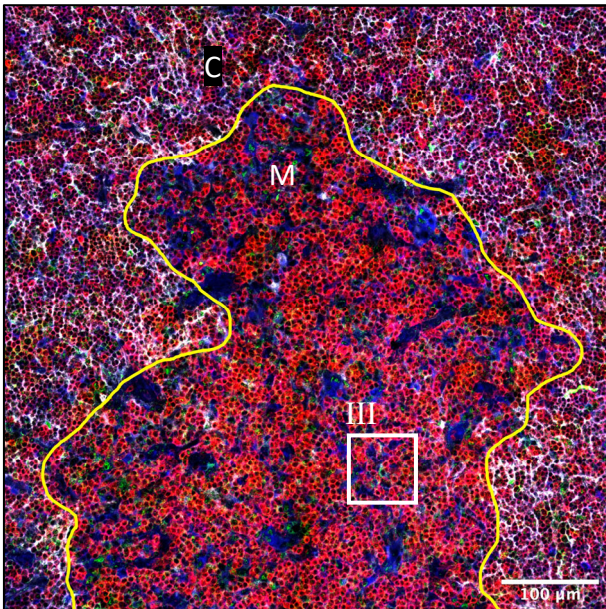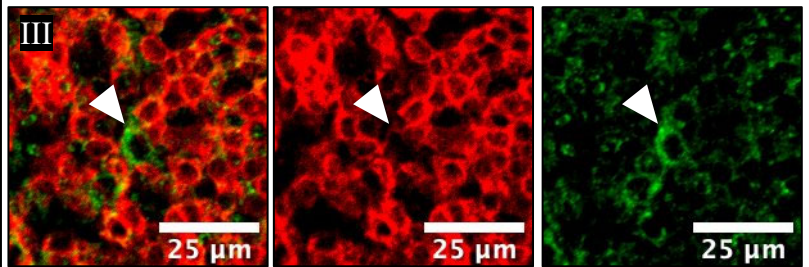

CD205 K5 CD3 MR1-Ac-6-FP Tetramer

CAST MR1<sup>-/-</sup> MR1-5-OP-RU Tetramer

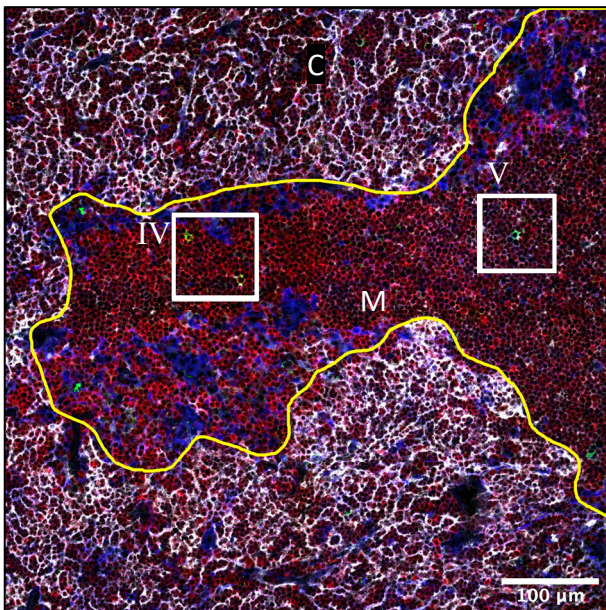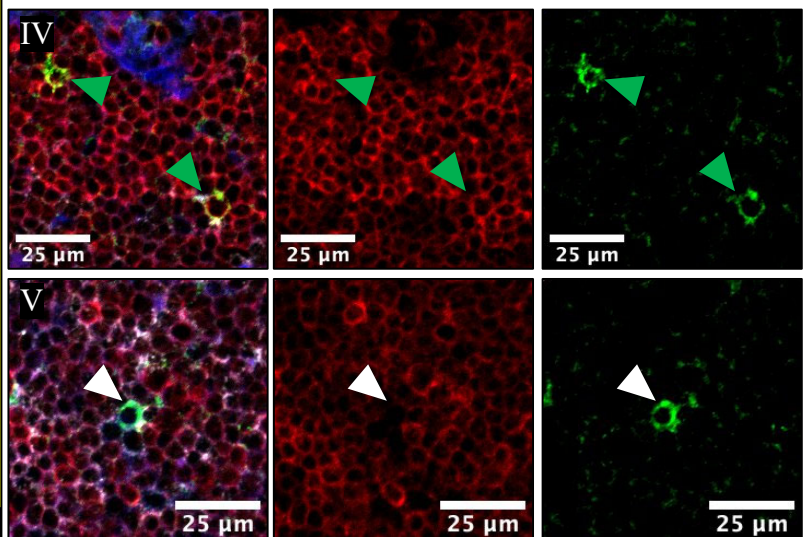

CD205 K5 CD3 MR1-5-OP-RU Tetramer

Supplementary Fig S14

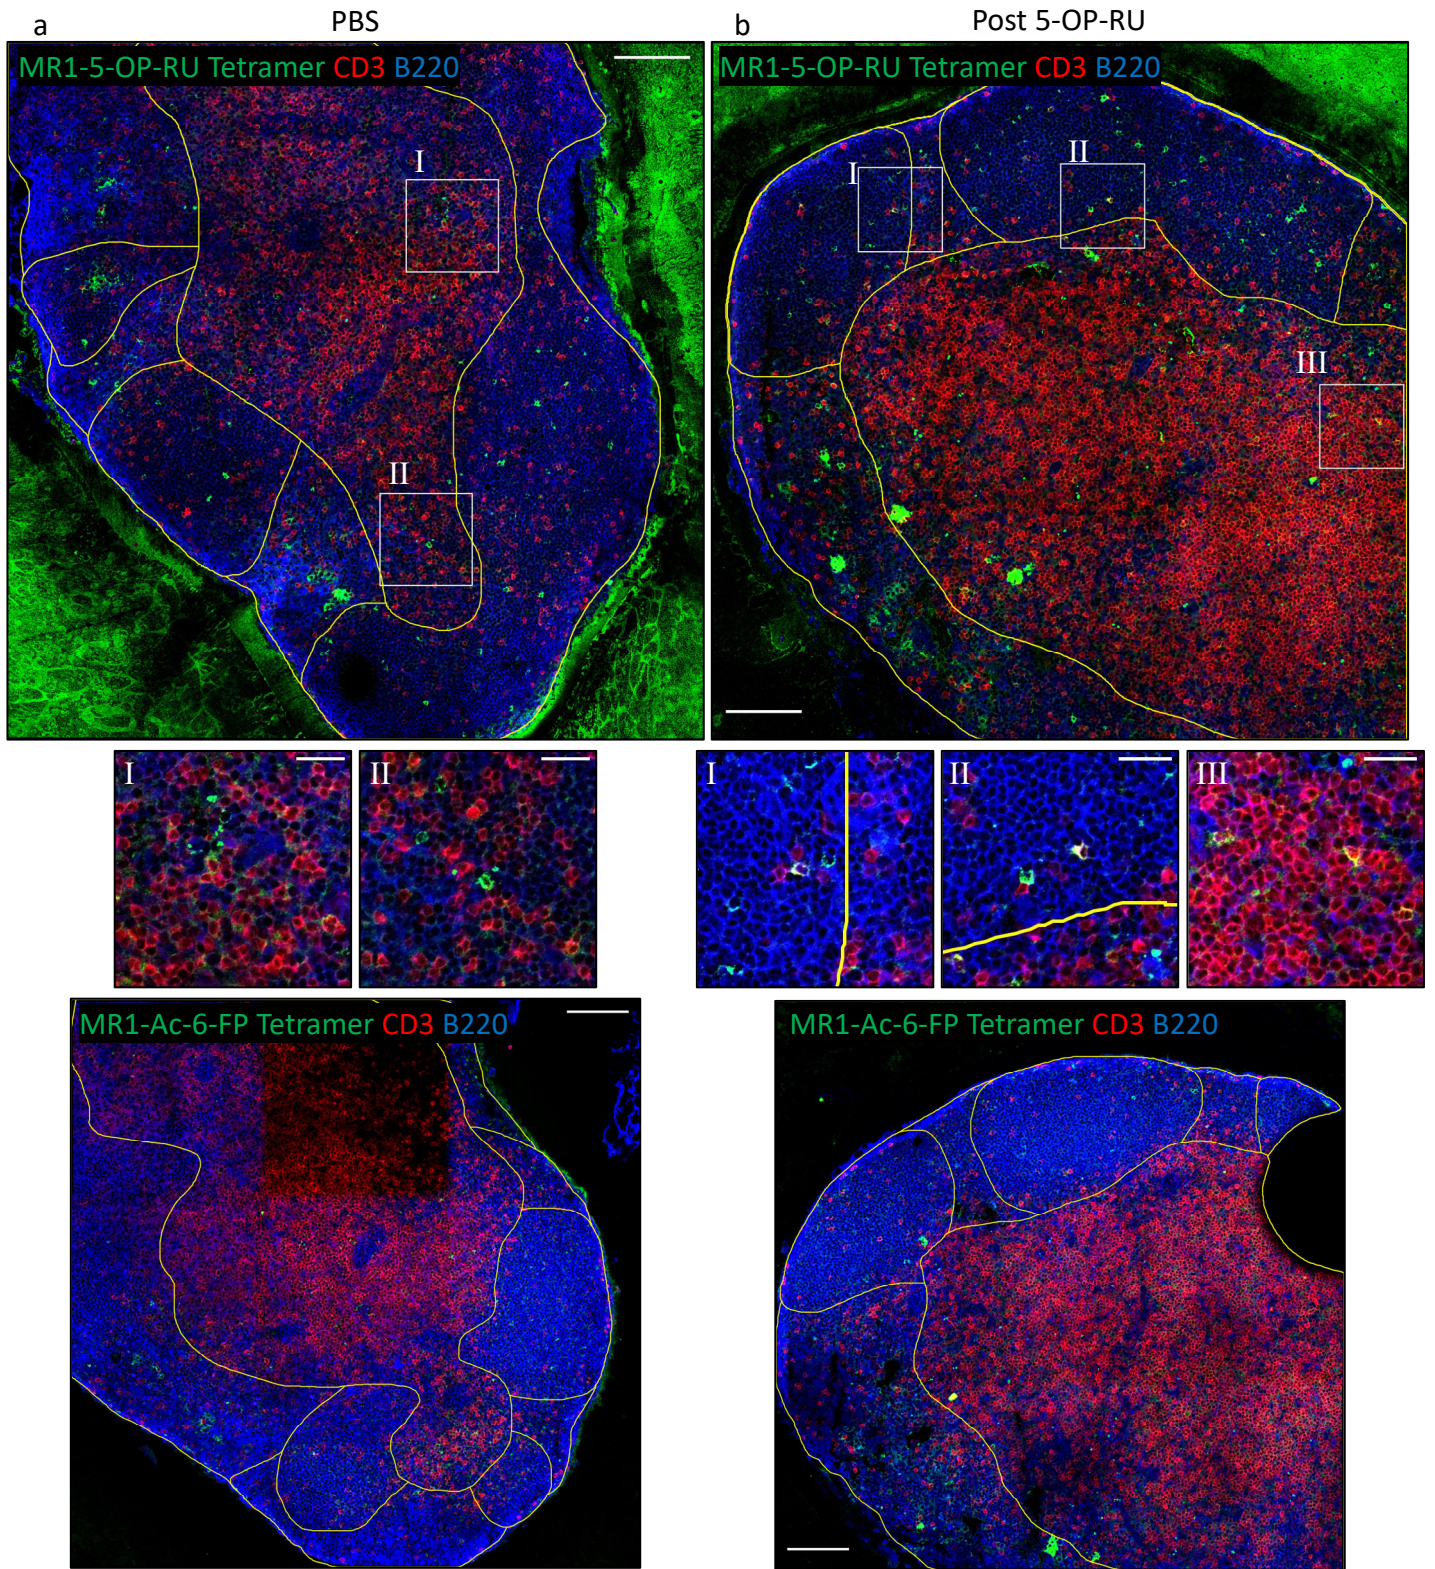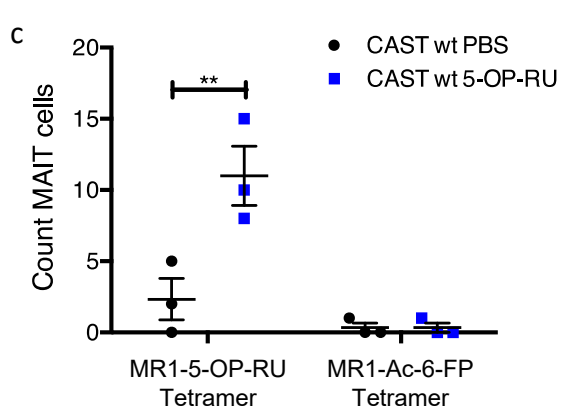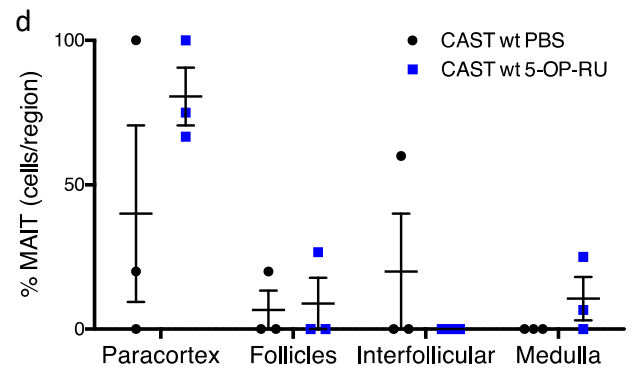

Supplement: 41598_2022_7704_MOESM1_ESM.pdf [file 41598_2022_7704_MOESM1_ESM.pdf]
